# Supplementary material for: Syntheses via a direct arylation method of push–pull molecules based on triphenylamine and 3-cyano-4-hexyloxythiophene moieties
Source: Royal Society of Chemistry journal article supplement (doi:10.1039/c6ob02036d), 2016-01-01
Supplement: c6ob02036d1.pdf [file c6ob02036d1.pdf]

## Supporting Information

### Syntheses via direct arylation method of push-pull molecules based on Triphenylamine and 3-cyano-4-hexyloxythiophene moieties

*Jérémie Grolleau, Frédéric Gohier, Clément Cabanetos, Stéphanie Legoupy and Pierre Frère*

Université d'Angers, MOLTECH-Anjou UMR CNRS 6200, 2 boulevard Lavoisier, 49045 Angers

|                                                                                      |        |
|--------------------------------------------------------------------------------------|--------|
| Crystallographic data of compound <b>II</b>                                          | 2      |
| Figure S1: X-Ray structure of <b>II</b>                                              | 3      |
| Figure S2: Calculated HOMO and LUMO of <b>II</b> and <b>III</b>                      | 4      |
| Figure S3:UV-vis absorption spectra of spin coated films of <b>II</b> and <b>III</b> | 5      |
| Preparation and characterization of BLJ solar cells                                  | 6      |
| Figure S4 : Photovoltaic characteristic of BLJ devices                               | 7      |
| Copy of <sup>1</sup> H and <sup>13</sup> C NMR of 2, 3, 4, I, II, III                | 8 - 19 |
| Copy of <sup>19</sup> F NMR of III                                                   | 20     |

## Crystallographic structure of compound II

Single crystals of **II** suitable for X-ray diffraction analysis were obtained by slow evaporation of a mixture of ethanol- chloroform solution. The compound crystallizes in the triclinic P-1 space group. X-ray single-crystal diffraction data were collected at 150 K on a BRUKER-NONIUS KappaCCD diffractometer, equipped with a graphite monochromator utilizing Mo K $\alpha$  radiation. The structure was solved by direct methods and refined on F<sup>2</sup> by the full-matrix least-squares method using the SHELX97 package. All non-H atoms were refined anisotropically and the H atoms were included in the calculation without refinement. The absorption was corrected by the SADABS program..

|                                 |                                                                                                                                       |
|---------------------------------|---------------------------------------------------------------------------------------------------------------------------------------|
| Empirical formula               | C <sub>33</sub> H <sub>28</sub> N <sub>4</sub> O S                                                                                    |
| Formula weight                  | 528.65                                                                                                                                |
| Wavelength                      | 1.54184 Å                                                                                                                             |
| Crystal system, space group     | Triclinic, P -1                                                                                                                       |
| Unit cell dimensions            | a = 10.5659(3) Å    alpha = 84.956(2) deg.<br>b = 13.3660(4) Å    beta = 76.050(2) deg.<br>c = 20.8146(4) Å    gamma = 77.060(2) deg. |
| Volume                          | 2778.58(13) Å <sup>3</sup>                                                                                                            |
| Z, Calculated density           | 4, 1.264 Mg/m <sup>3</sup>                                                                                                            |
| Absorption coefficient          | 1.289 mm <sup>-1</sup>                                                                                                                |
| F(000)                          | 1112                                                                                                                                  |
| Crystal size                    | 0.3759 x 0.0840 x 0.0157 mm                                                                                                           |
| Theta range for data collection | 3.39 to 76.84 deg.                                                                                                                    |
| Limiting indices                | -12 ≤ h ≤ 13, -16 ≤ k ≤ 16, -22 ≤ l ≤ 26                                                                                              |
| Reflections collected / unique  | 27539 / 11378 [R(int) = 0.0388]                                                                                                       |
| Completeness to theta = 72.00   | 99.0 %                                                                                                                                |

|                                   |                                             |
|-----------------------------------|---------------------------------------------|
| Absorption correction             | Semi-empirical from equivalents             |
| Max. and min. transmission        | 1.00000 and 0.87281                         |
| Refinement method                 | Full-matrix least-squares on F <sup>2</sup> |
| Data / restraints / parameters    | 11378 / 0 / 705                             |
| Goodness-of-fit on F <sup>2</sup> | 1.074                                       |
| Final R indices [I > 2σ(I)]       | R1 = 0.0538, wR2 = 0.1434 [9534 Fo]         |
| R indices (all data)              | R1 = 0.0653, wR2 = 0.1554                   |
| Largest diff. peak and hole       | 0.488 and -0.383 e.Å <sup>-3</sup>          |

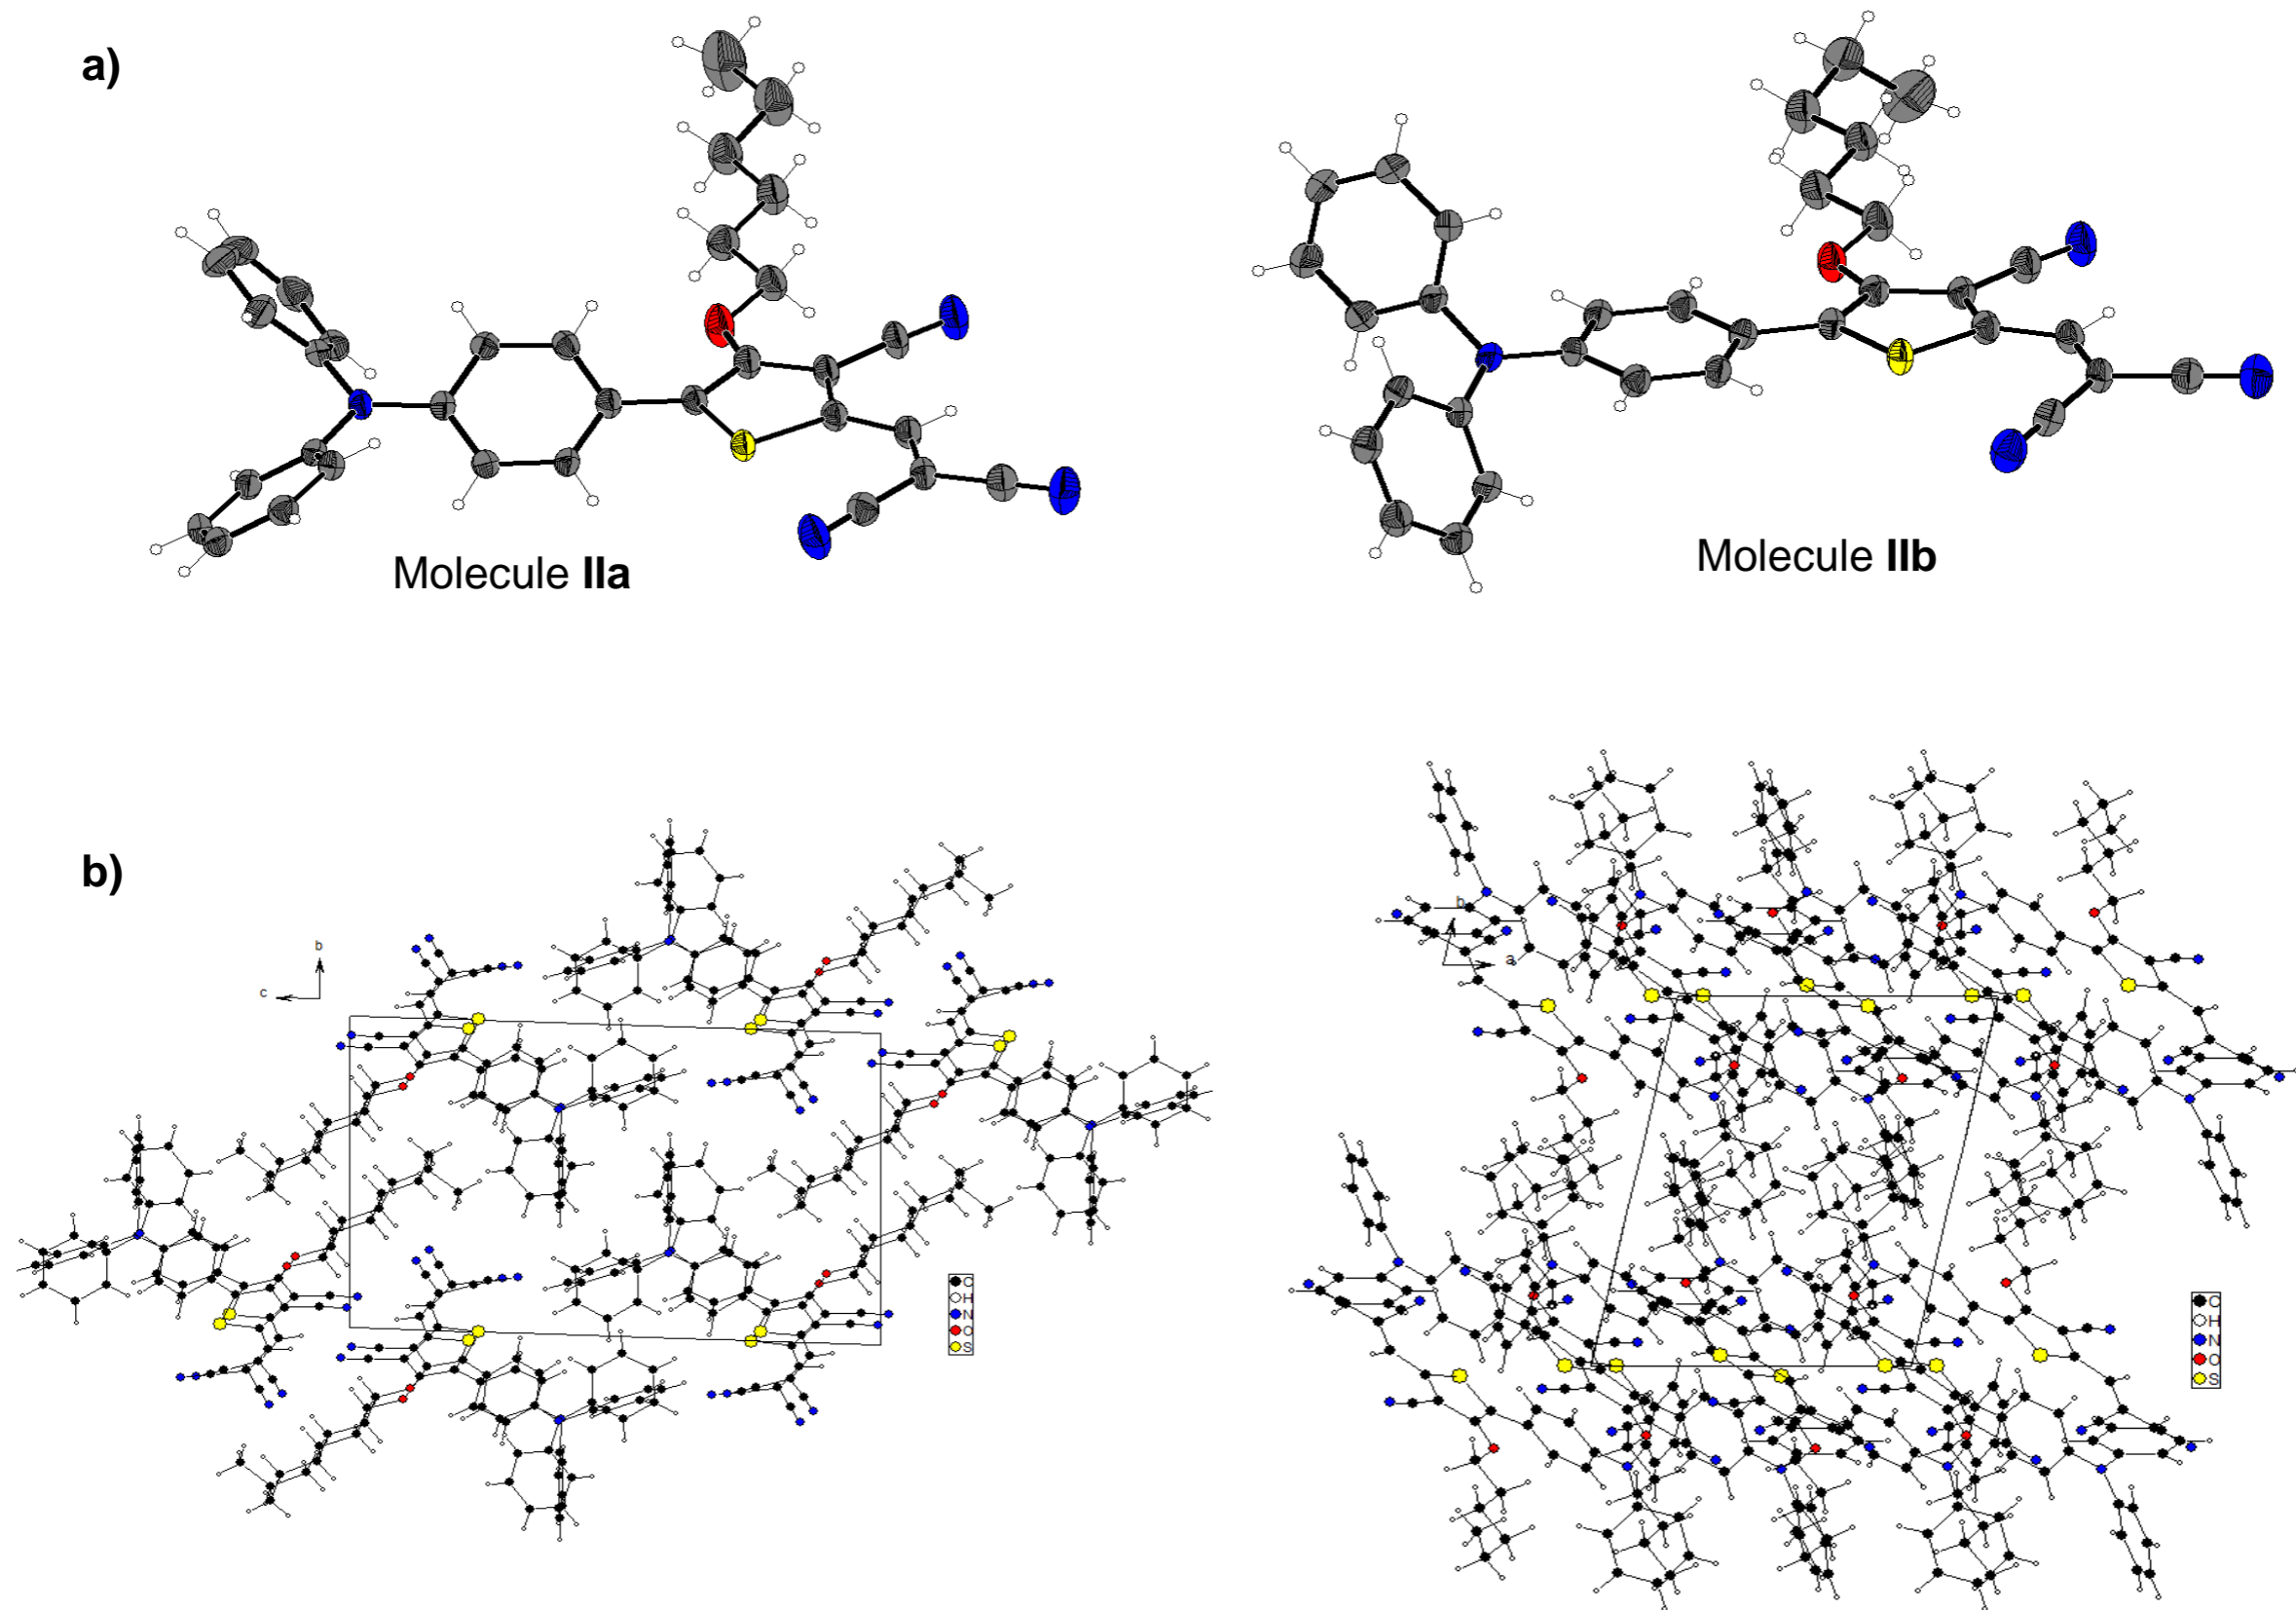

Figure S1: X-Ray structure of compound II.

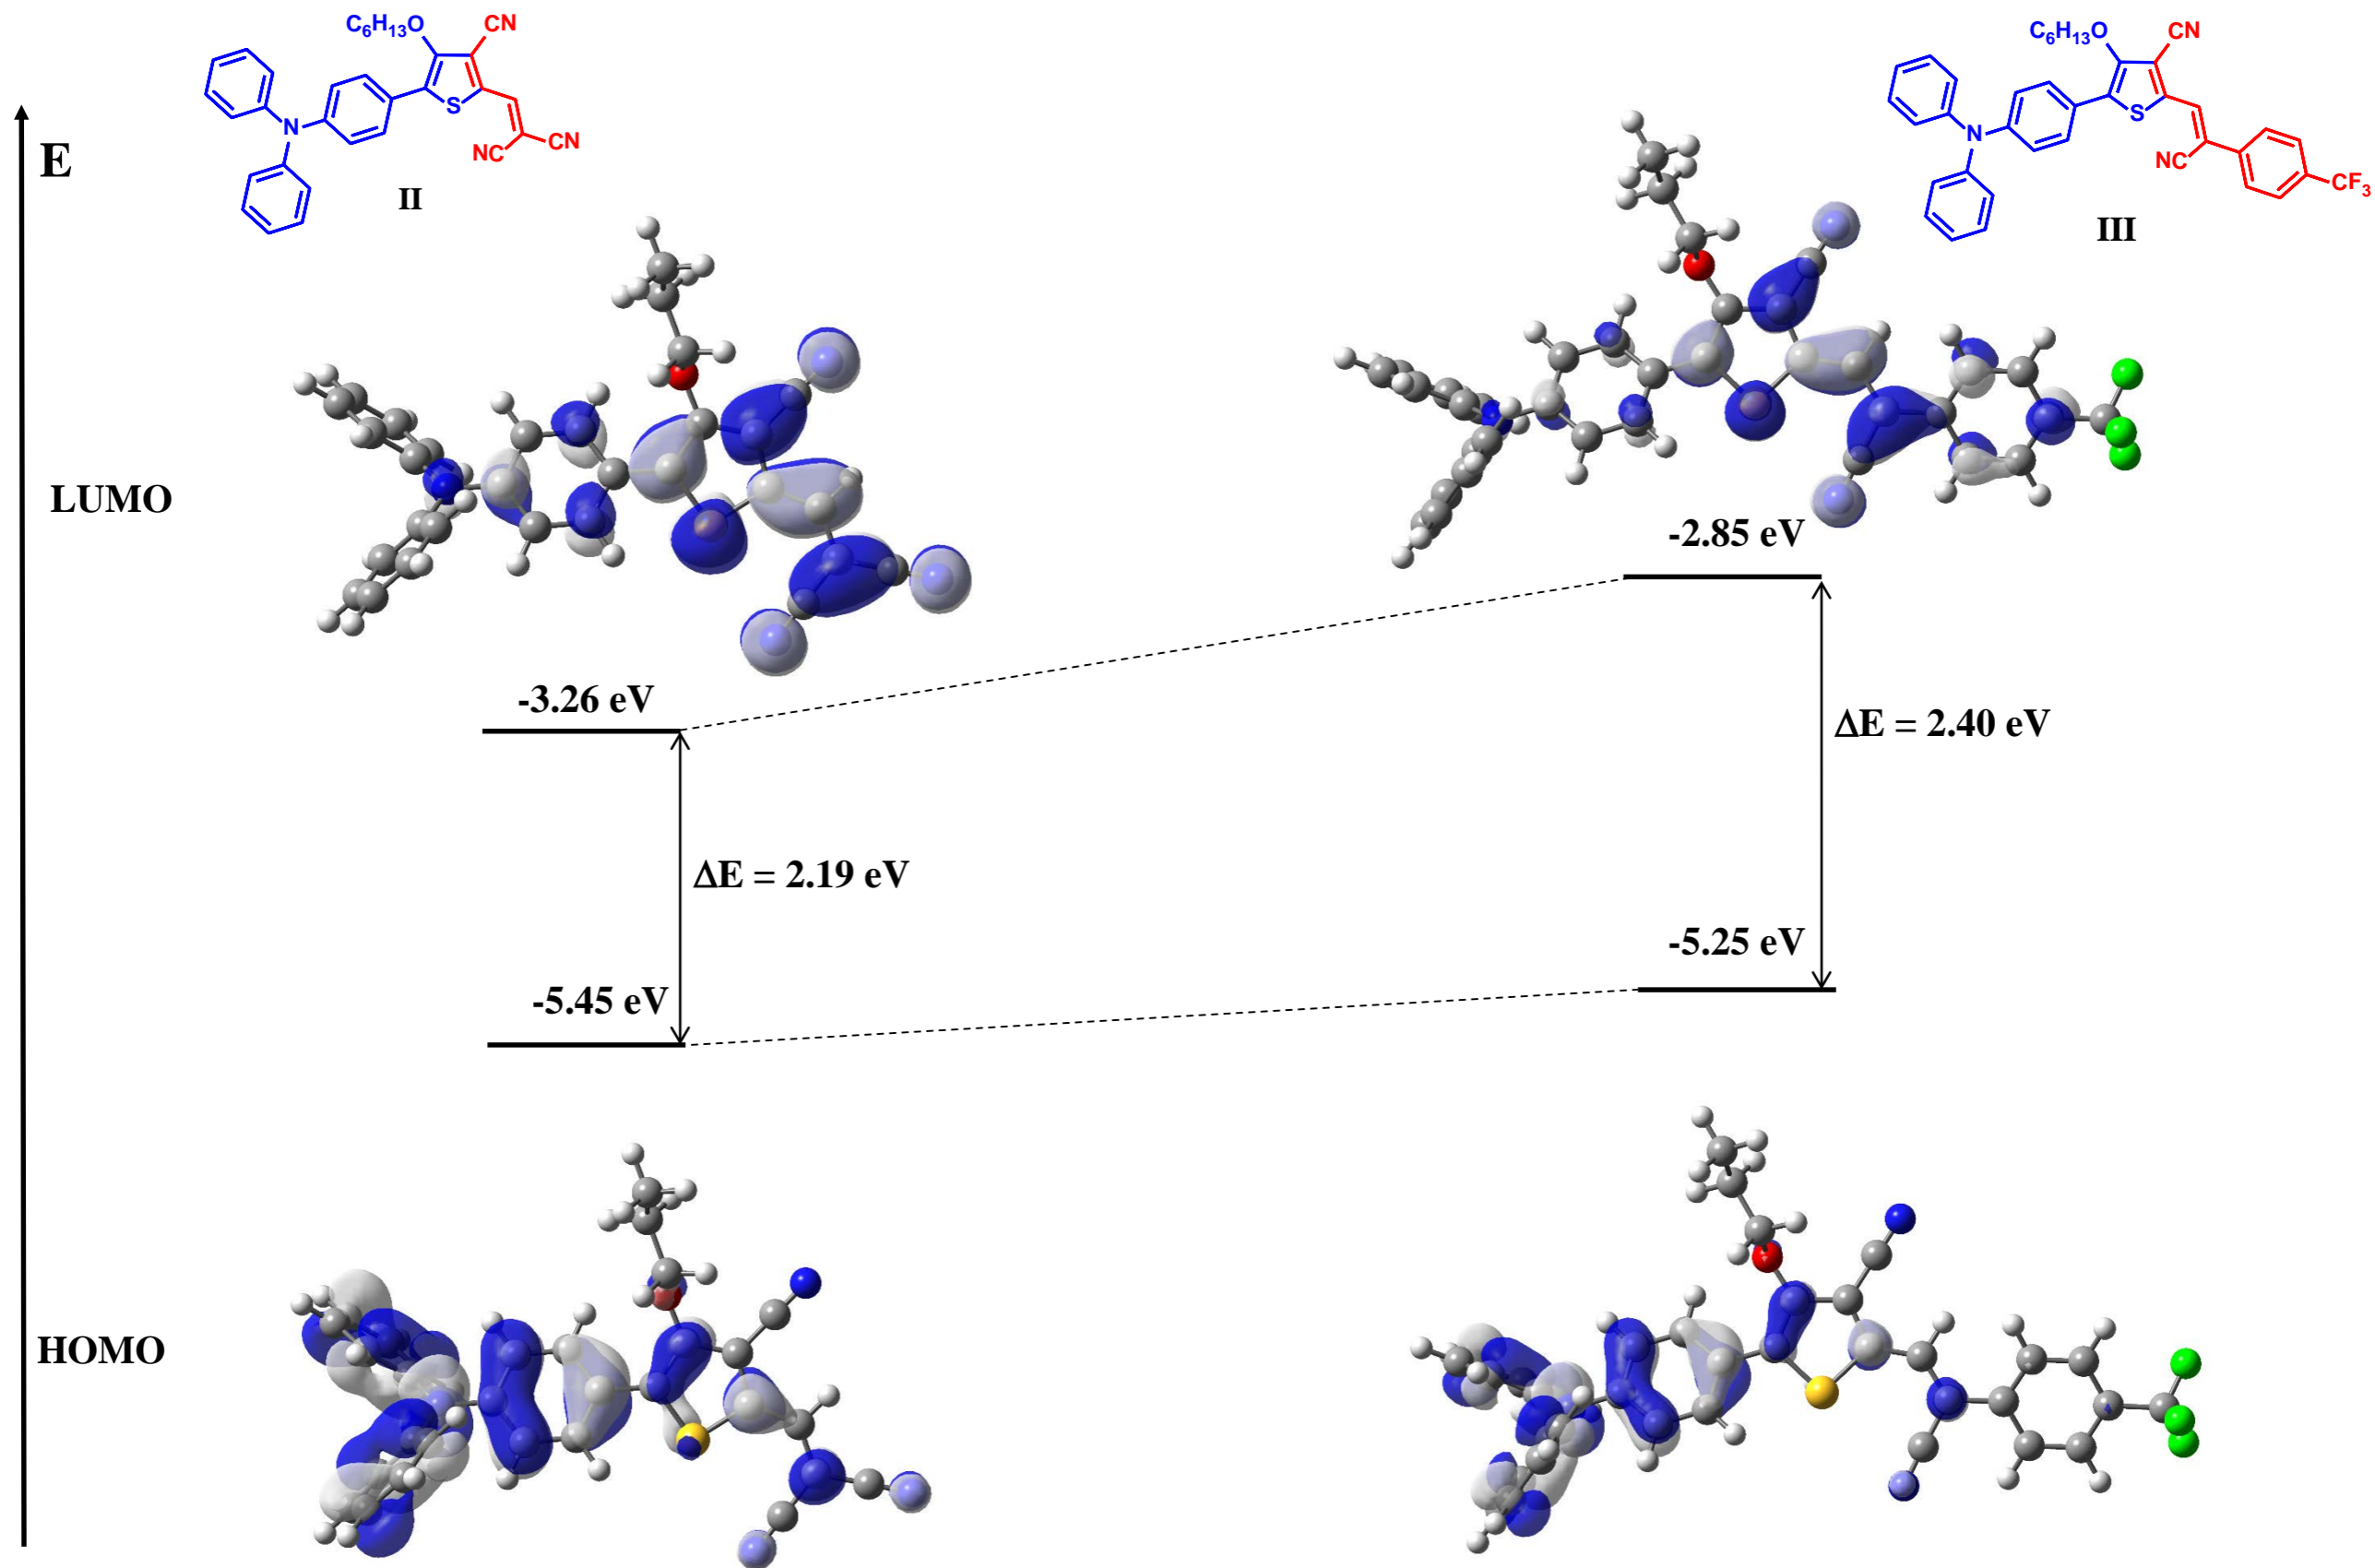

**Figure S2:** Calculated HOMOs and LUMOs (Gaussian 09, B3LYP – 6.31G (d,p)) and schematic representation of the energy levels for **II** and **III**.

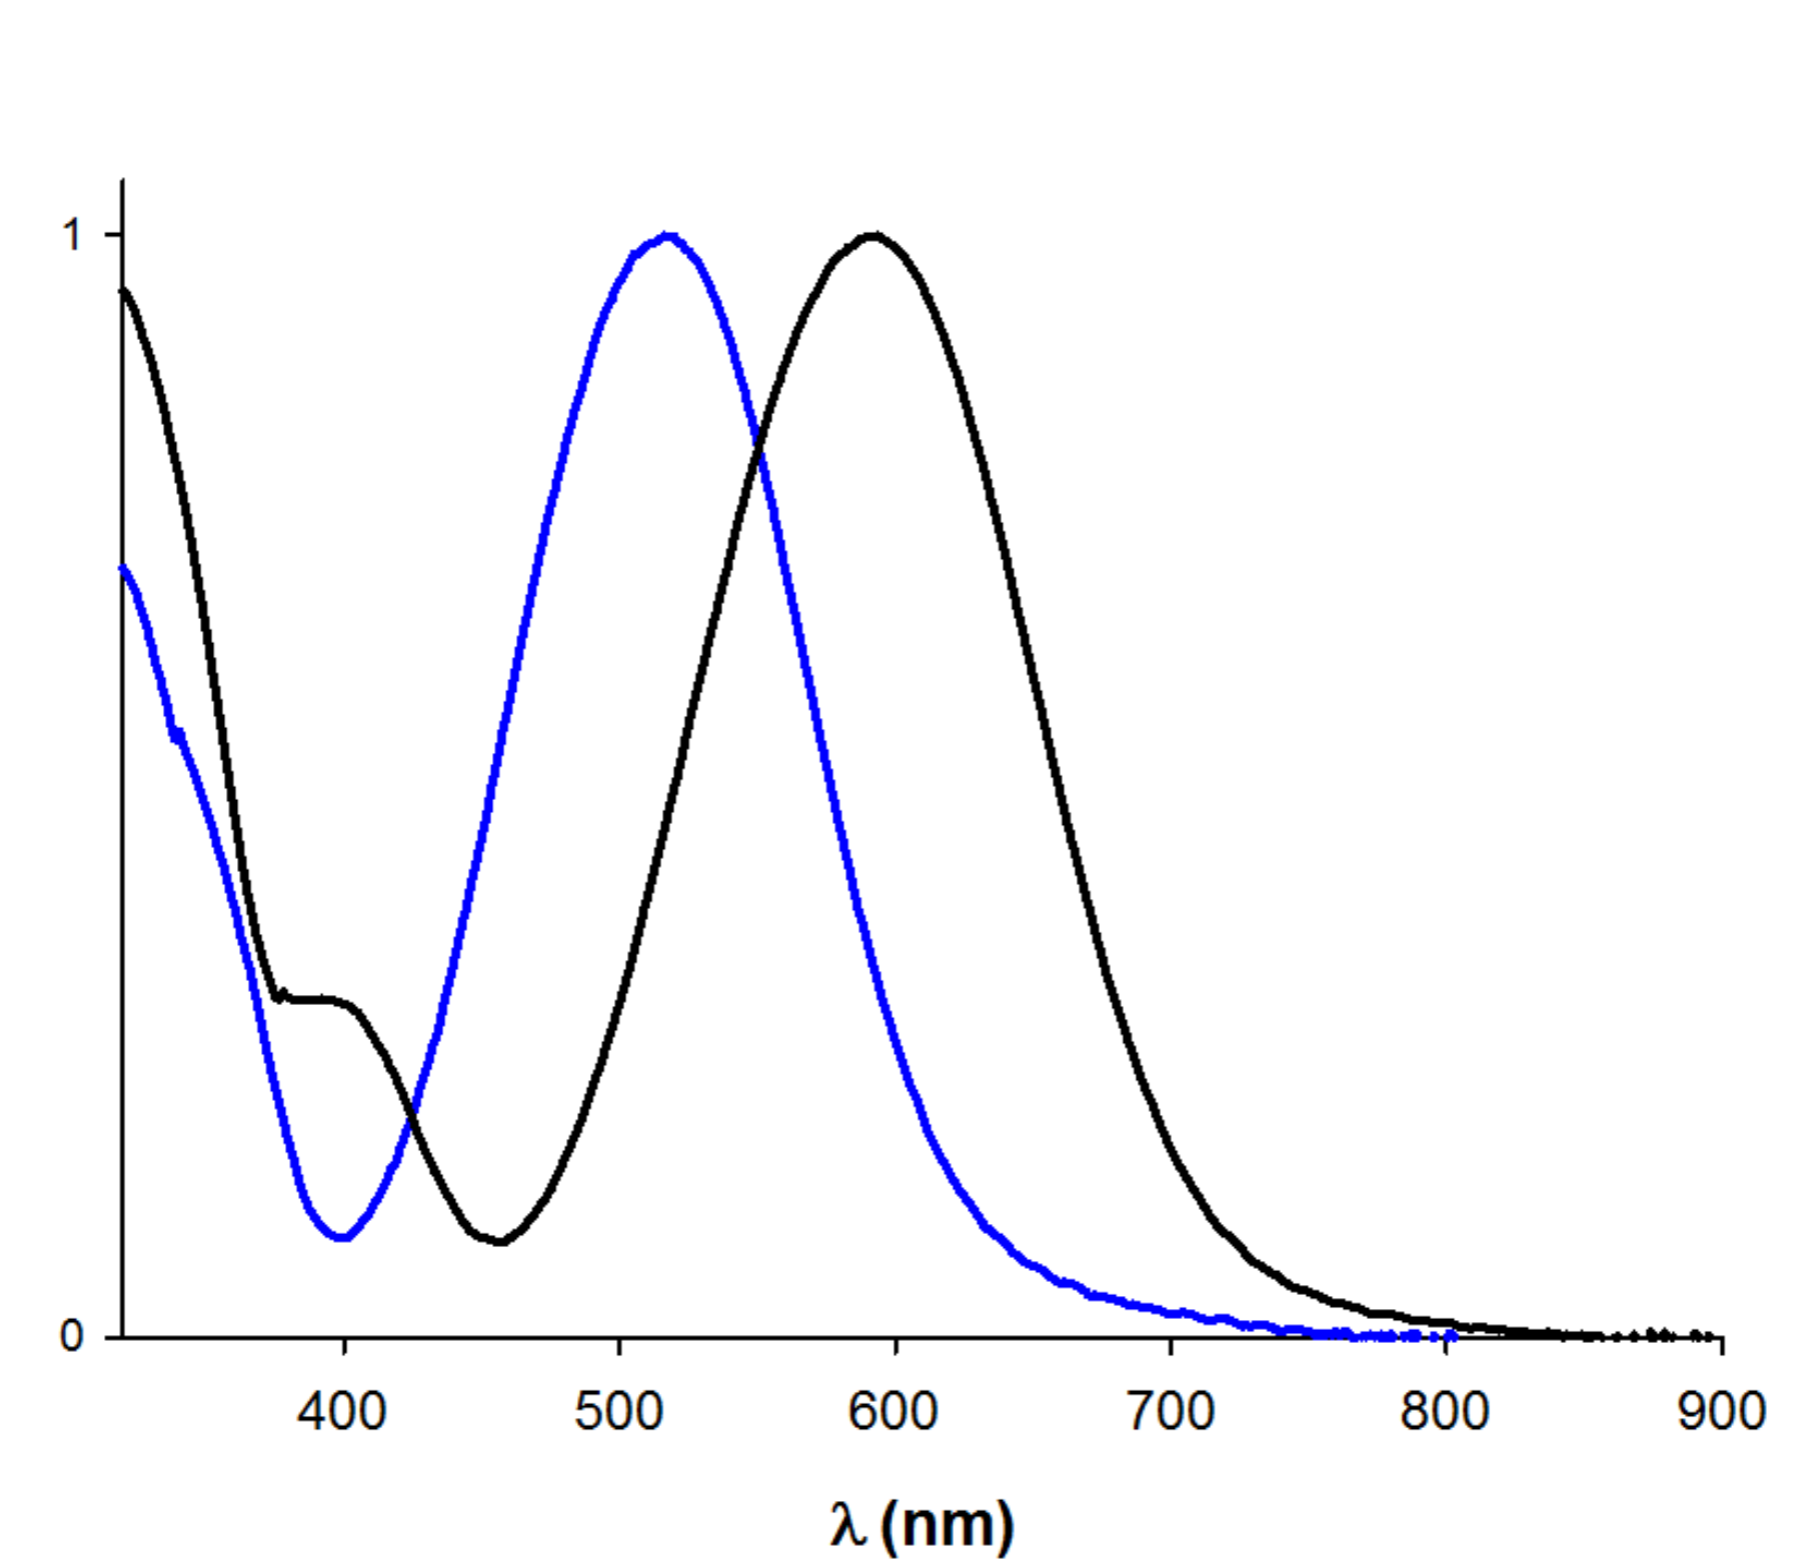

**Figure S3:** Normalized UV-vis absorption spectra of spin coated films of **II** (black) and **III** (blue)

## Bilayer heterojunction cells (BLJ)

### Preparation of the solar cells

Indium-tin oxide coated glass slides of  $24 \times 25 \times 1.1$  mm with a sheet resistance of  $RS = 10 \Omega/\text{sq}$  were purchased from VisionTek Systems Ltd. The substrates were scrubbed using dishwashing soap before being cleaned by a series of ultrasonic treatments for 15 min in distilled water, acetone, and isopropanol. Once dried under a steam of nitrogen, a UV-ozone plasma treatment (UV/Ozone ProCleaner Plus, Bioforce Nanosciences) was performed for 15 min. A filtered aqueous solution of poly(3,4-ethylenedioxy-thiophene)-poly(styrenesulfonate) (PEDOT:PSS; Clevios P VP. AI 4083) through a  $0.45 \mu\text{m}$  RC membrane (Millex®) was spun-cast onto the patterned ITO surface at 5000 rpm for 40 s before being baked at  $115^\circ\text{C}$  for 15 min. The best devices were obtained with films spun-cast from chloroform solutions at 6000 rpm for **DA1**, **DA2** and Blend containing 10 mg/mL of material(s). Finally, OSCs were completed by the successive thermal deposition of  $\text{C}_{60}$  (30 nm) and aluminum (80 nm) at a pressure of  $10^{-6}$  Torr through a shadow mask defining two cells of  $27 \text{ mm}^2$  each. J vs V curves were recorded in the dark and under illumination using a Keithley 236 source-measure unit and a home-made acquisition program. The light source is an AM1.5 Solar Constant 575 PV simulator (Steuernagel Lichttechnik, equipped with a metal halogen lamp). The light intensity was measured by a broad-band power meter (13PEM001, Melles Griot). EQE was recorded under ambient atmosphere using a halogen lamp (Osram) with an Action Spectra Pro 150 monochromator, a lock-in amplifier (Perkin-Elmer 7225) and a S2281 photodiode (Hamamatsu).

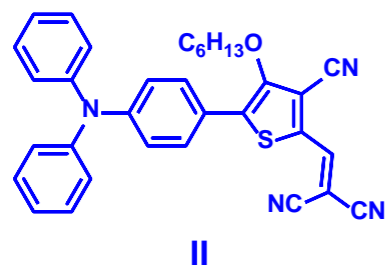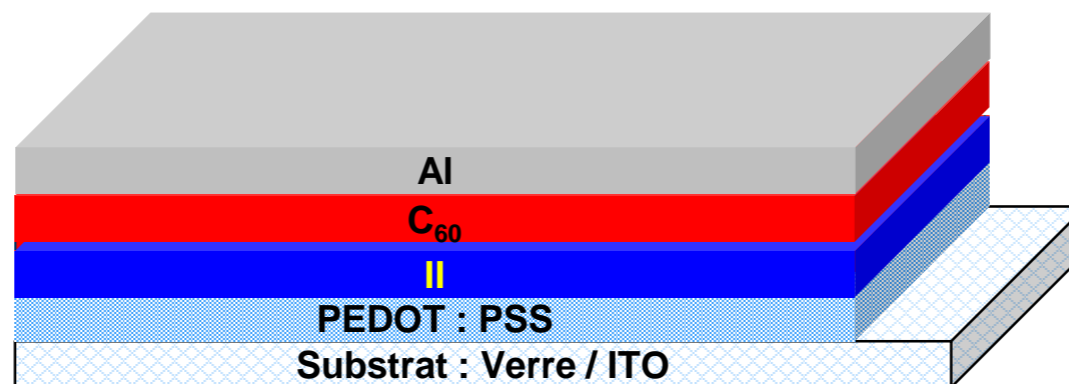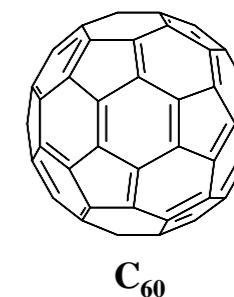

### Results of BLJ cells

| Voc (V) | Jsc (mA/cm <sup>2</sup> ) | FF (%) | PCE (%)           |
|---------|---------------------------|--------|-------------------|
| 0,70    | 4,96                      | 29     | 1.22 (max = 1,23) |

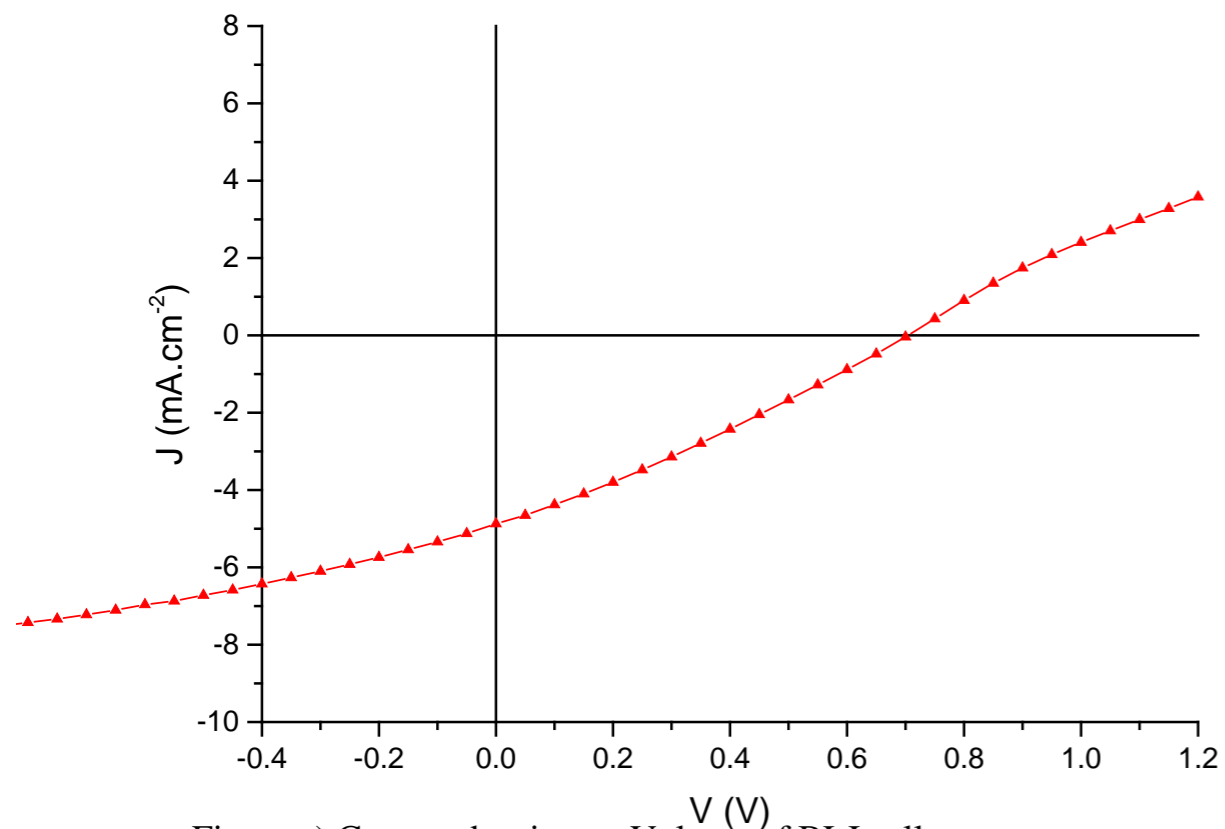

Figure a) Current density vs. Voltage of BLJ cells

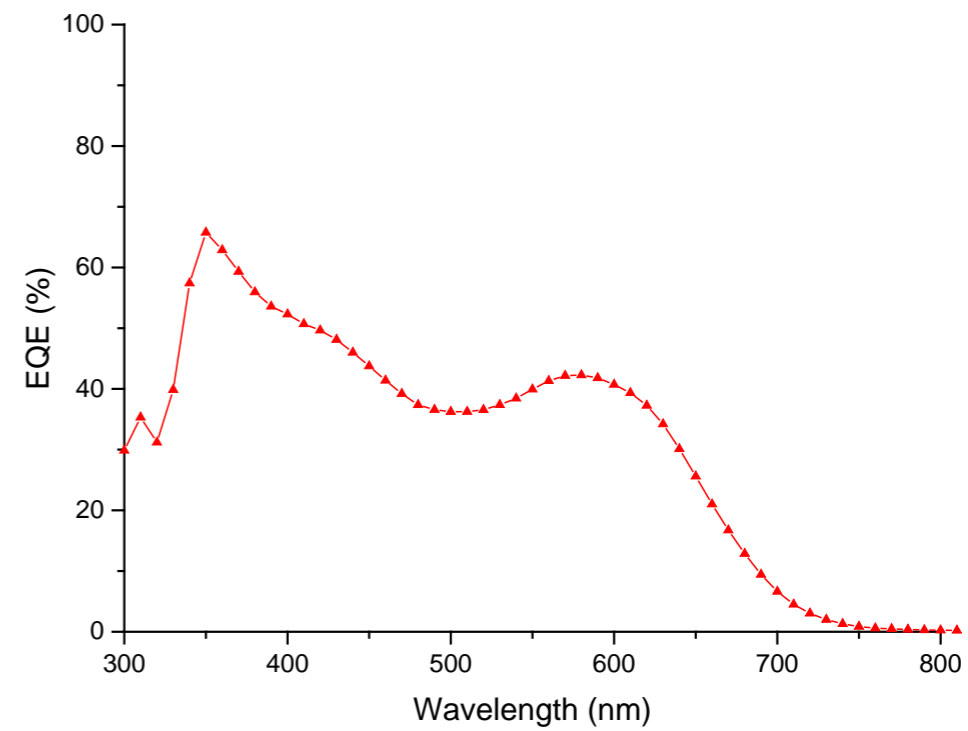

Figure b) EQE spectra of BLJ cells

**Figure S4** : Photovoltaic characteristic of BLJ devices based on compound **II** as donor material and C<sub>60</sub> as acceptor material

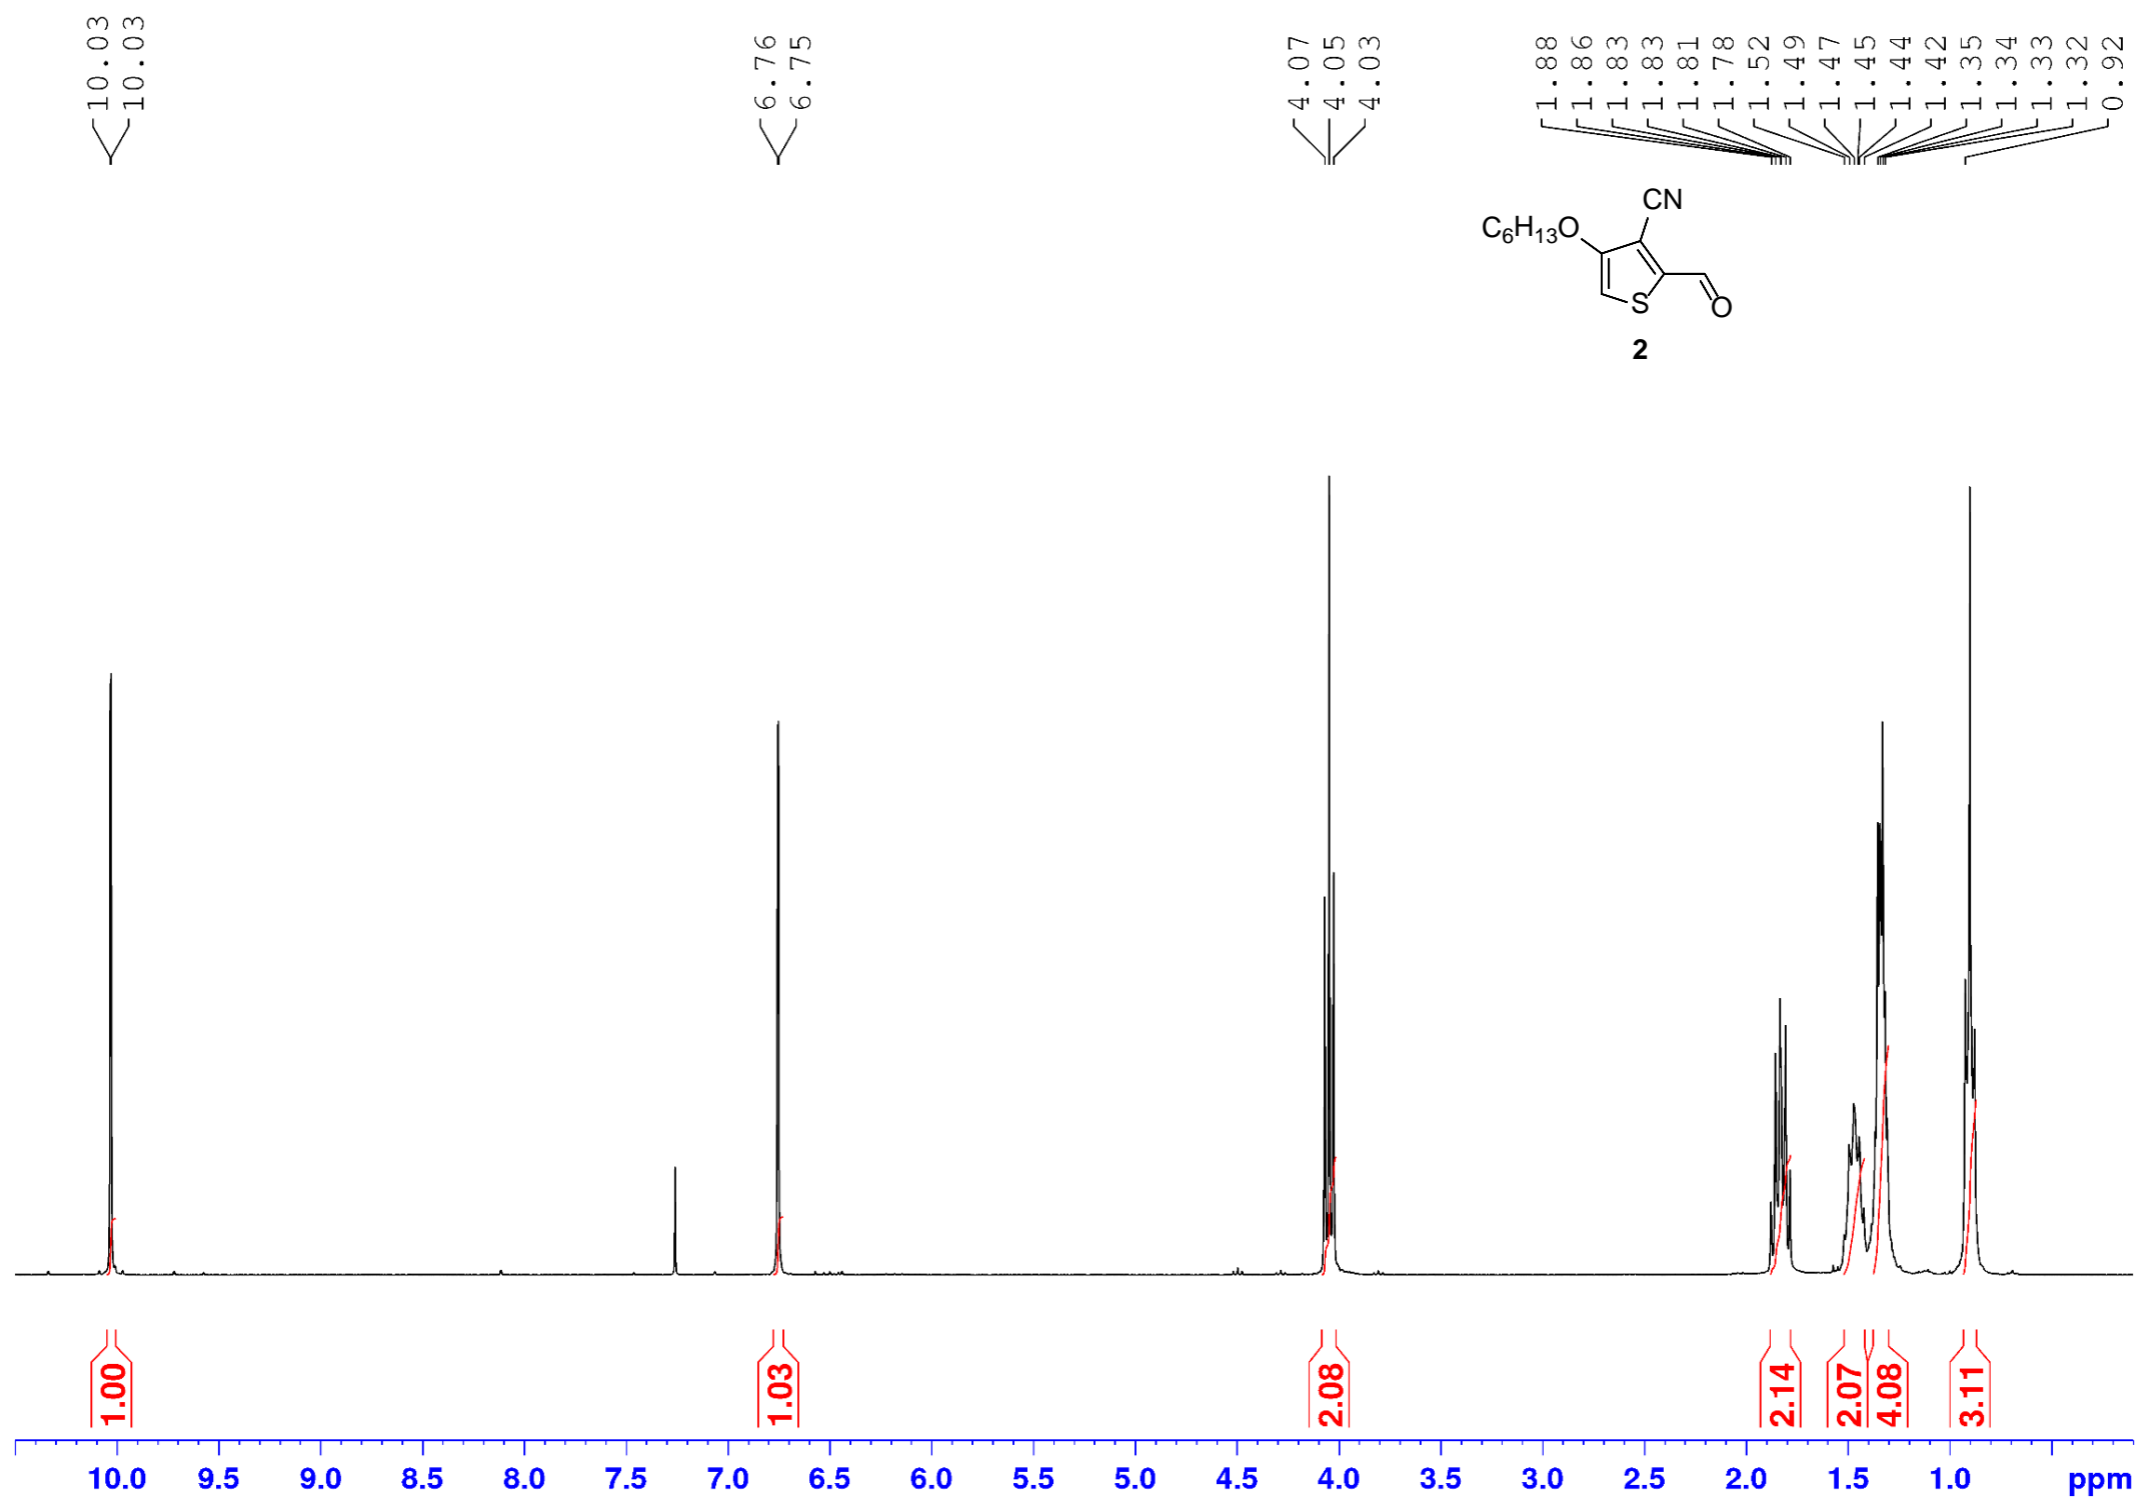

Figure S5 : <sup>1</sup>H NMR spectra in CDCl<sub>3</sub> of **2**



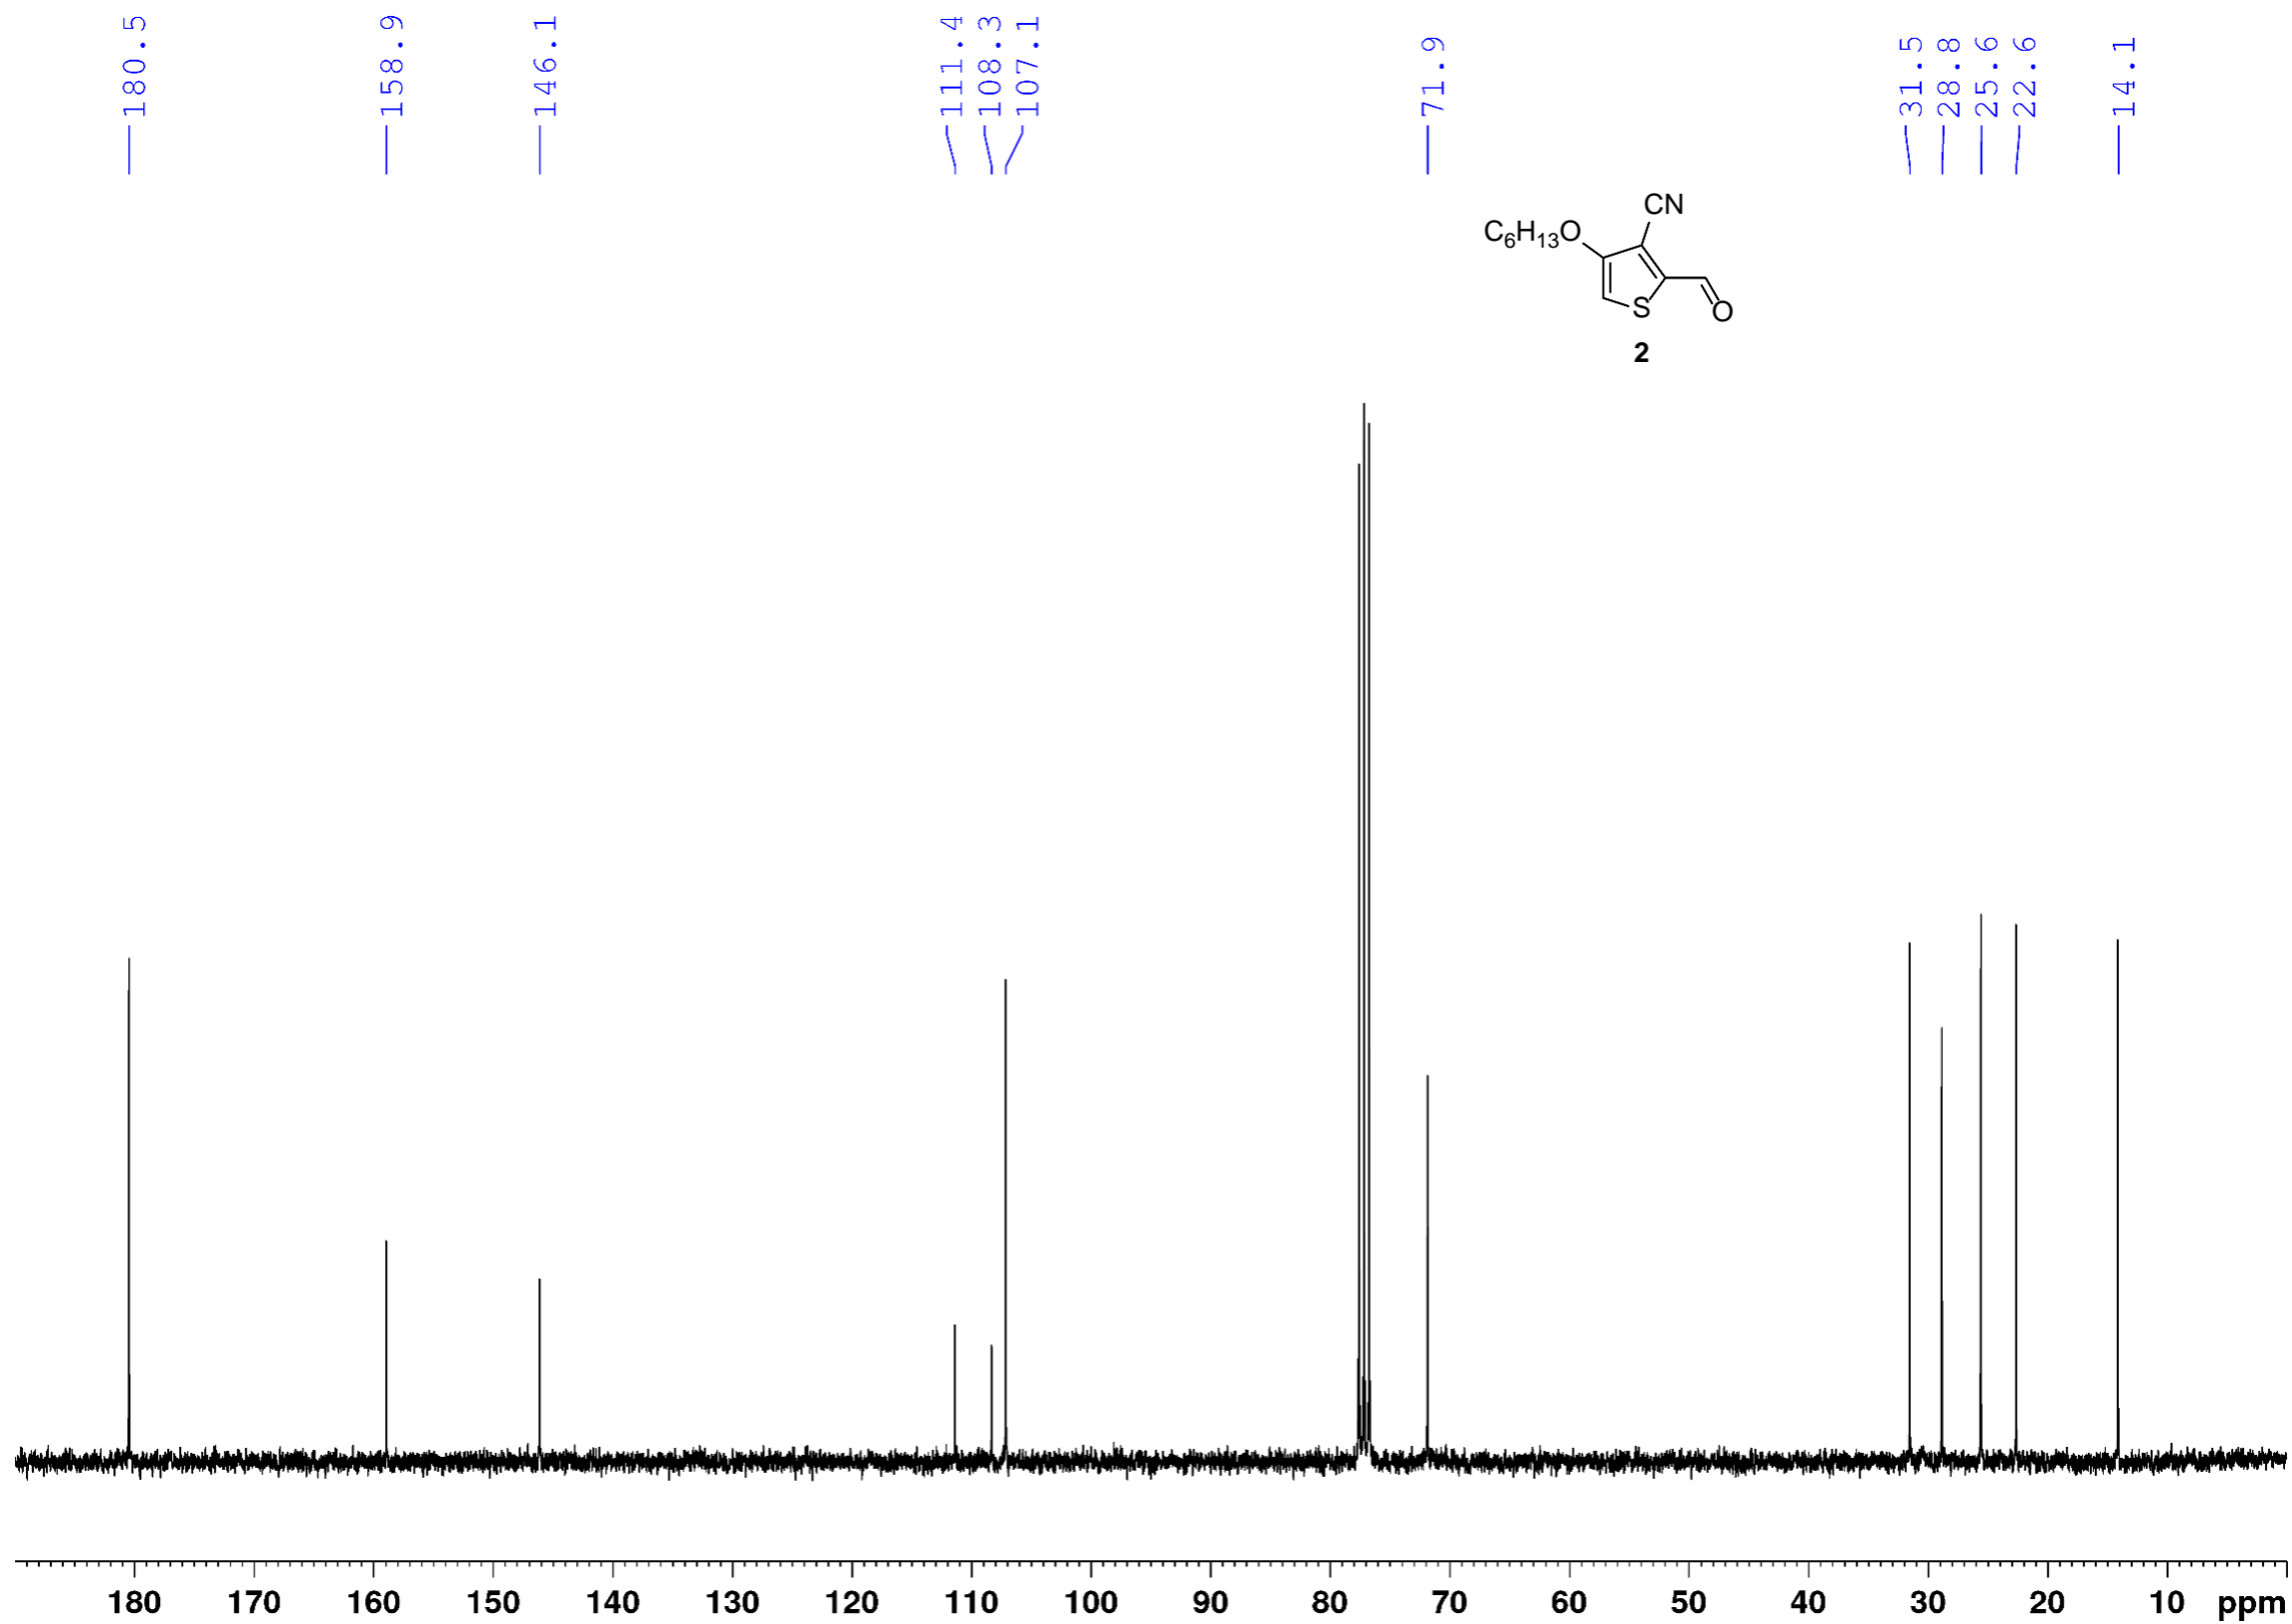

**Figure S6 :** <sup>13</sup>C NMR spectra in CDCl<sub>3</sub> of **2**

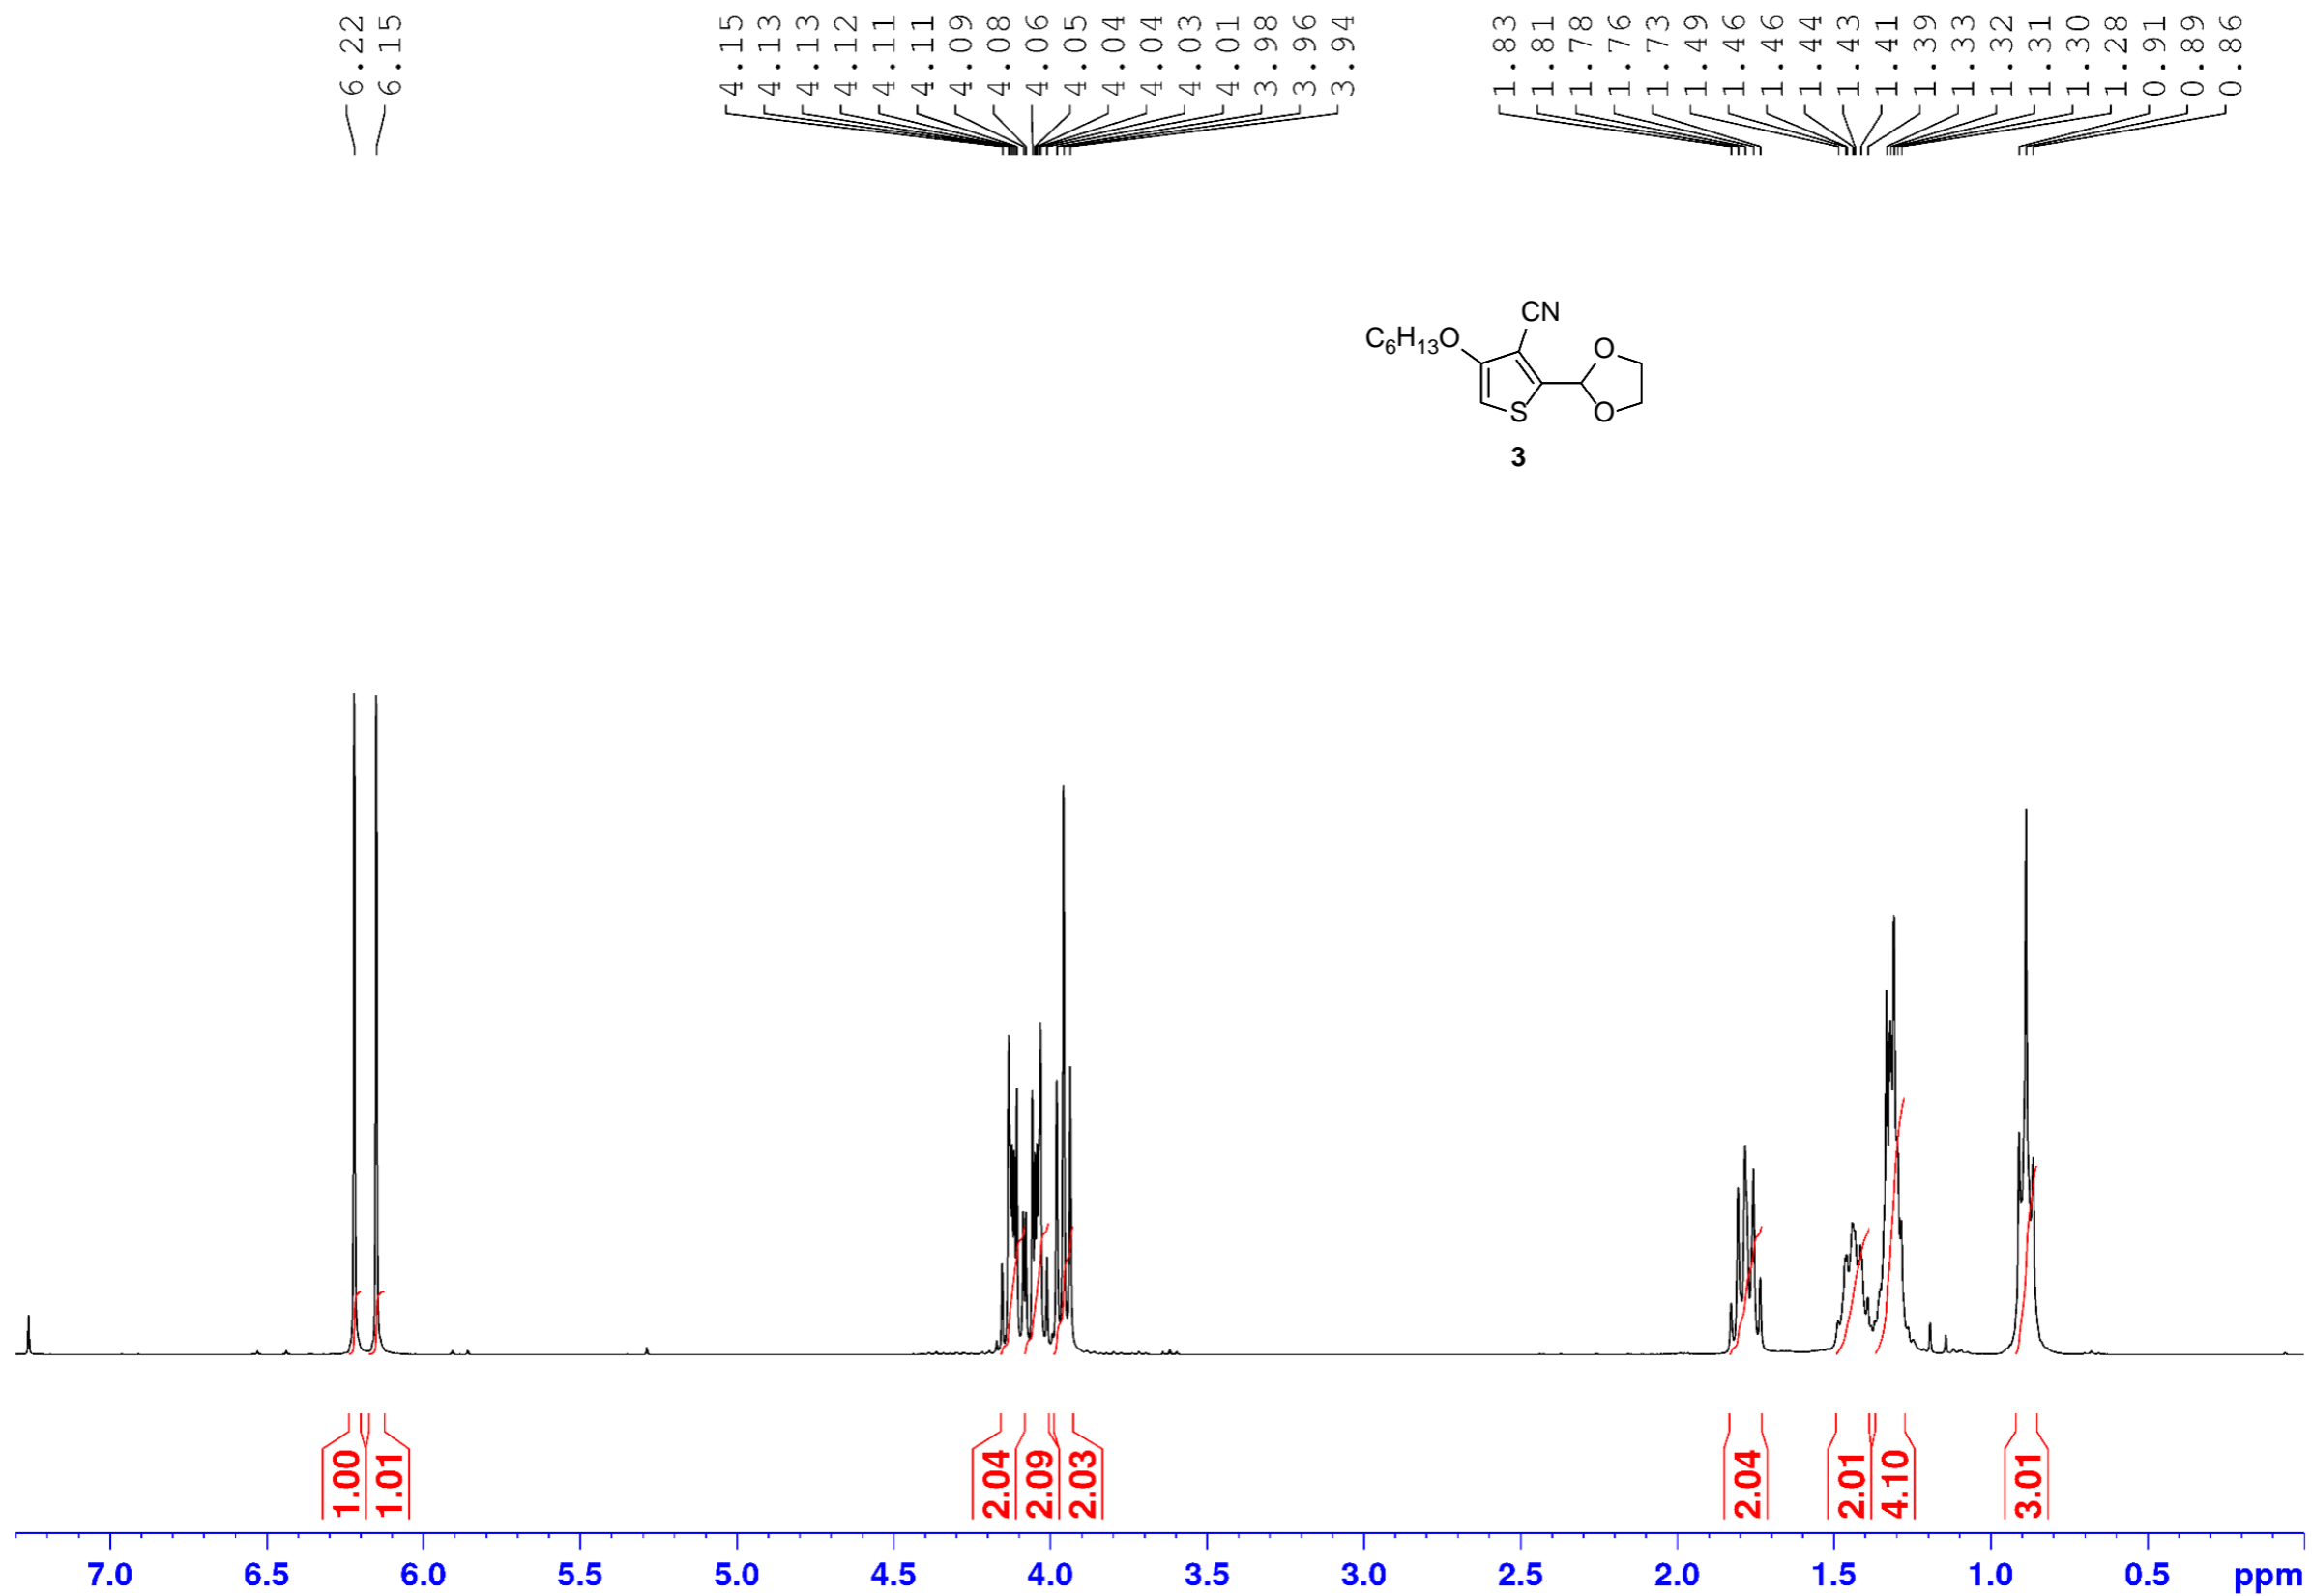

**Figure S7 :**  $^1\text{H}$  NMR spectra in  $\text{CDCl}_3$  of **3**

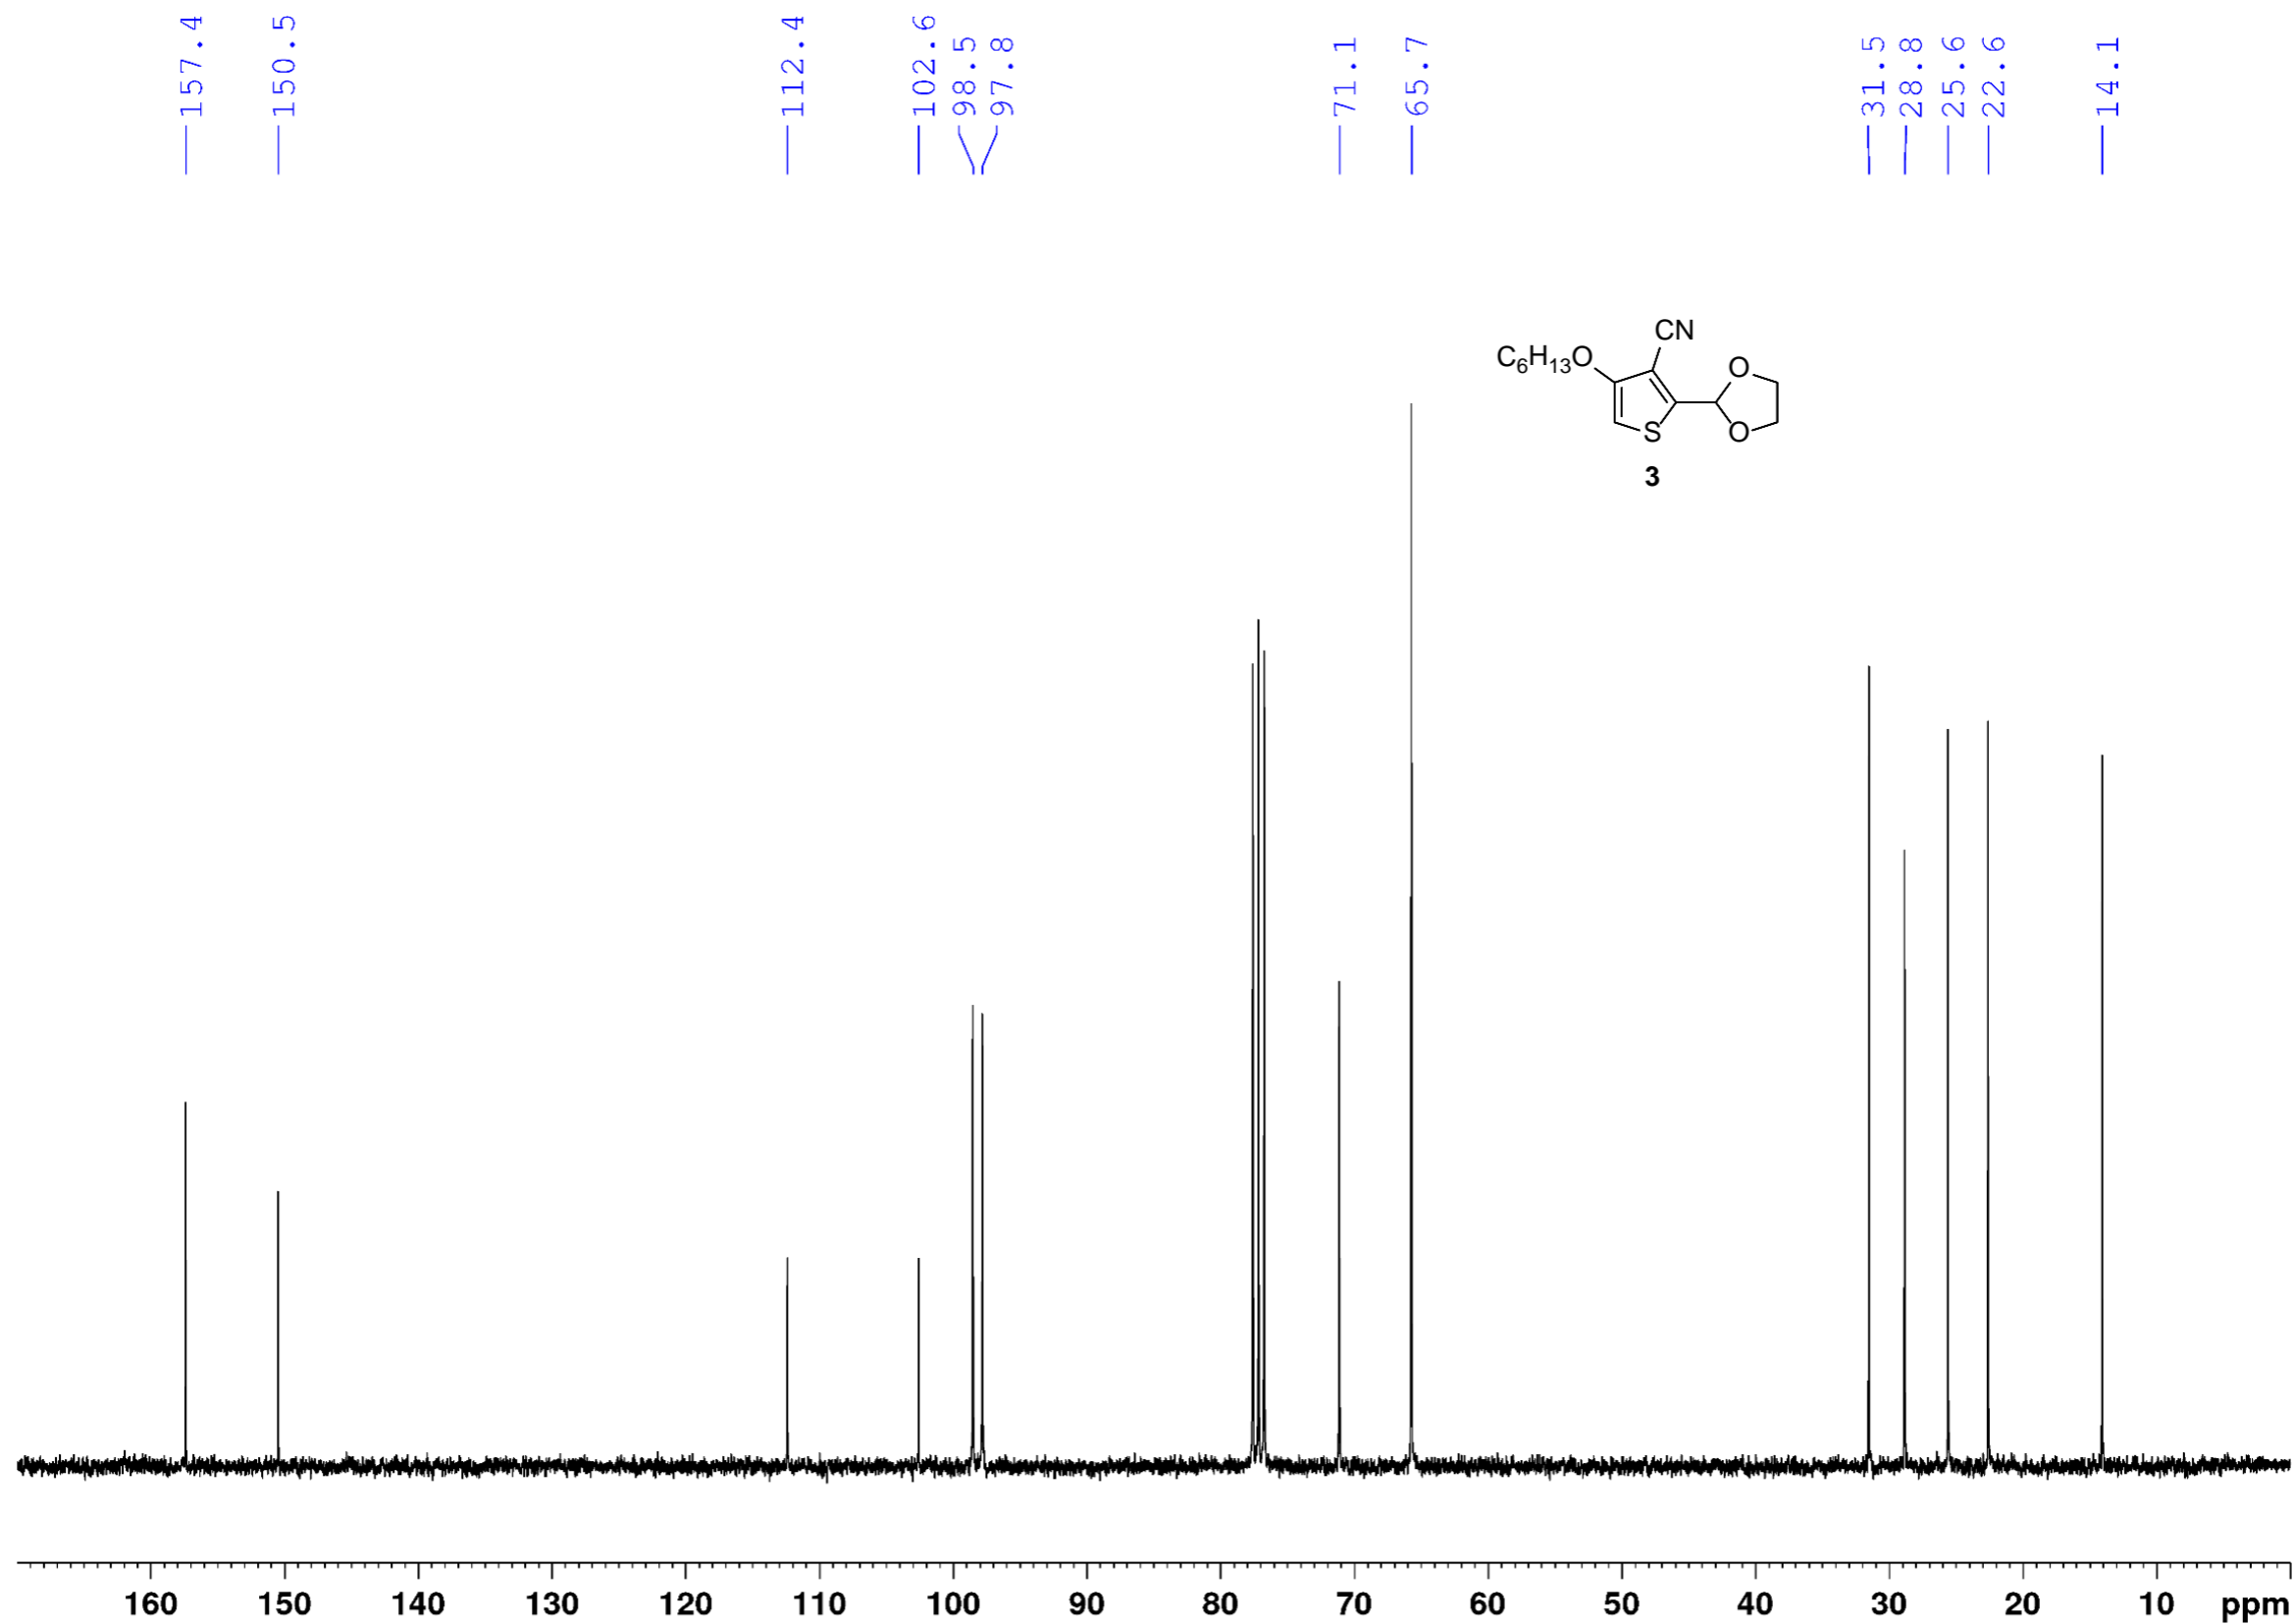

**Figure S8:**  $^{13}\text{C}$  NMR spectra in  $\text{CDCl}_3$  of **3**

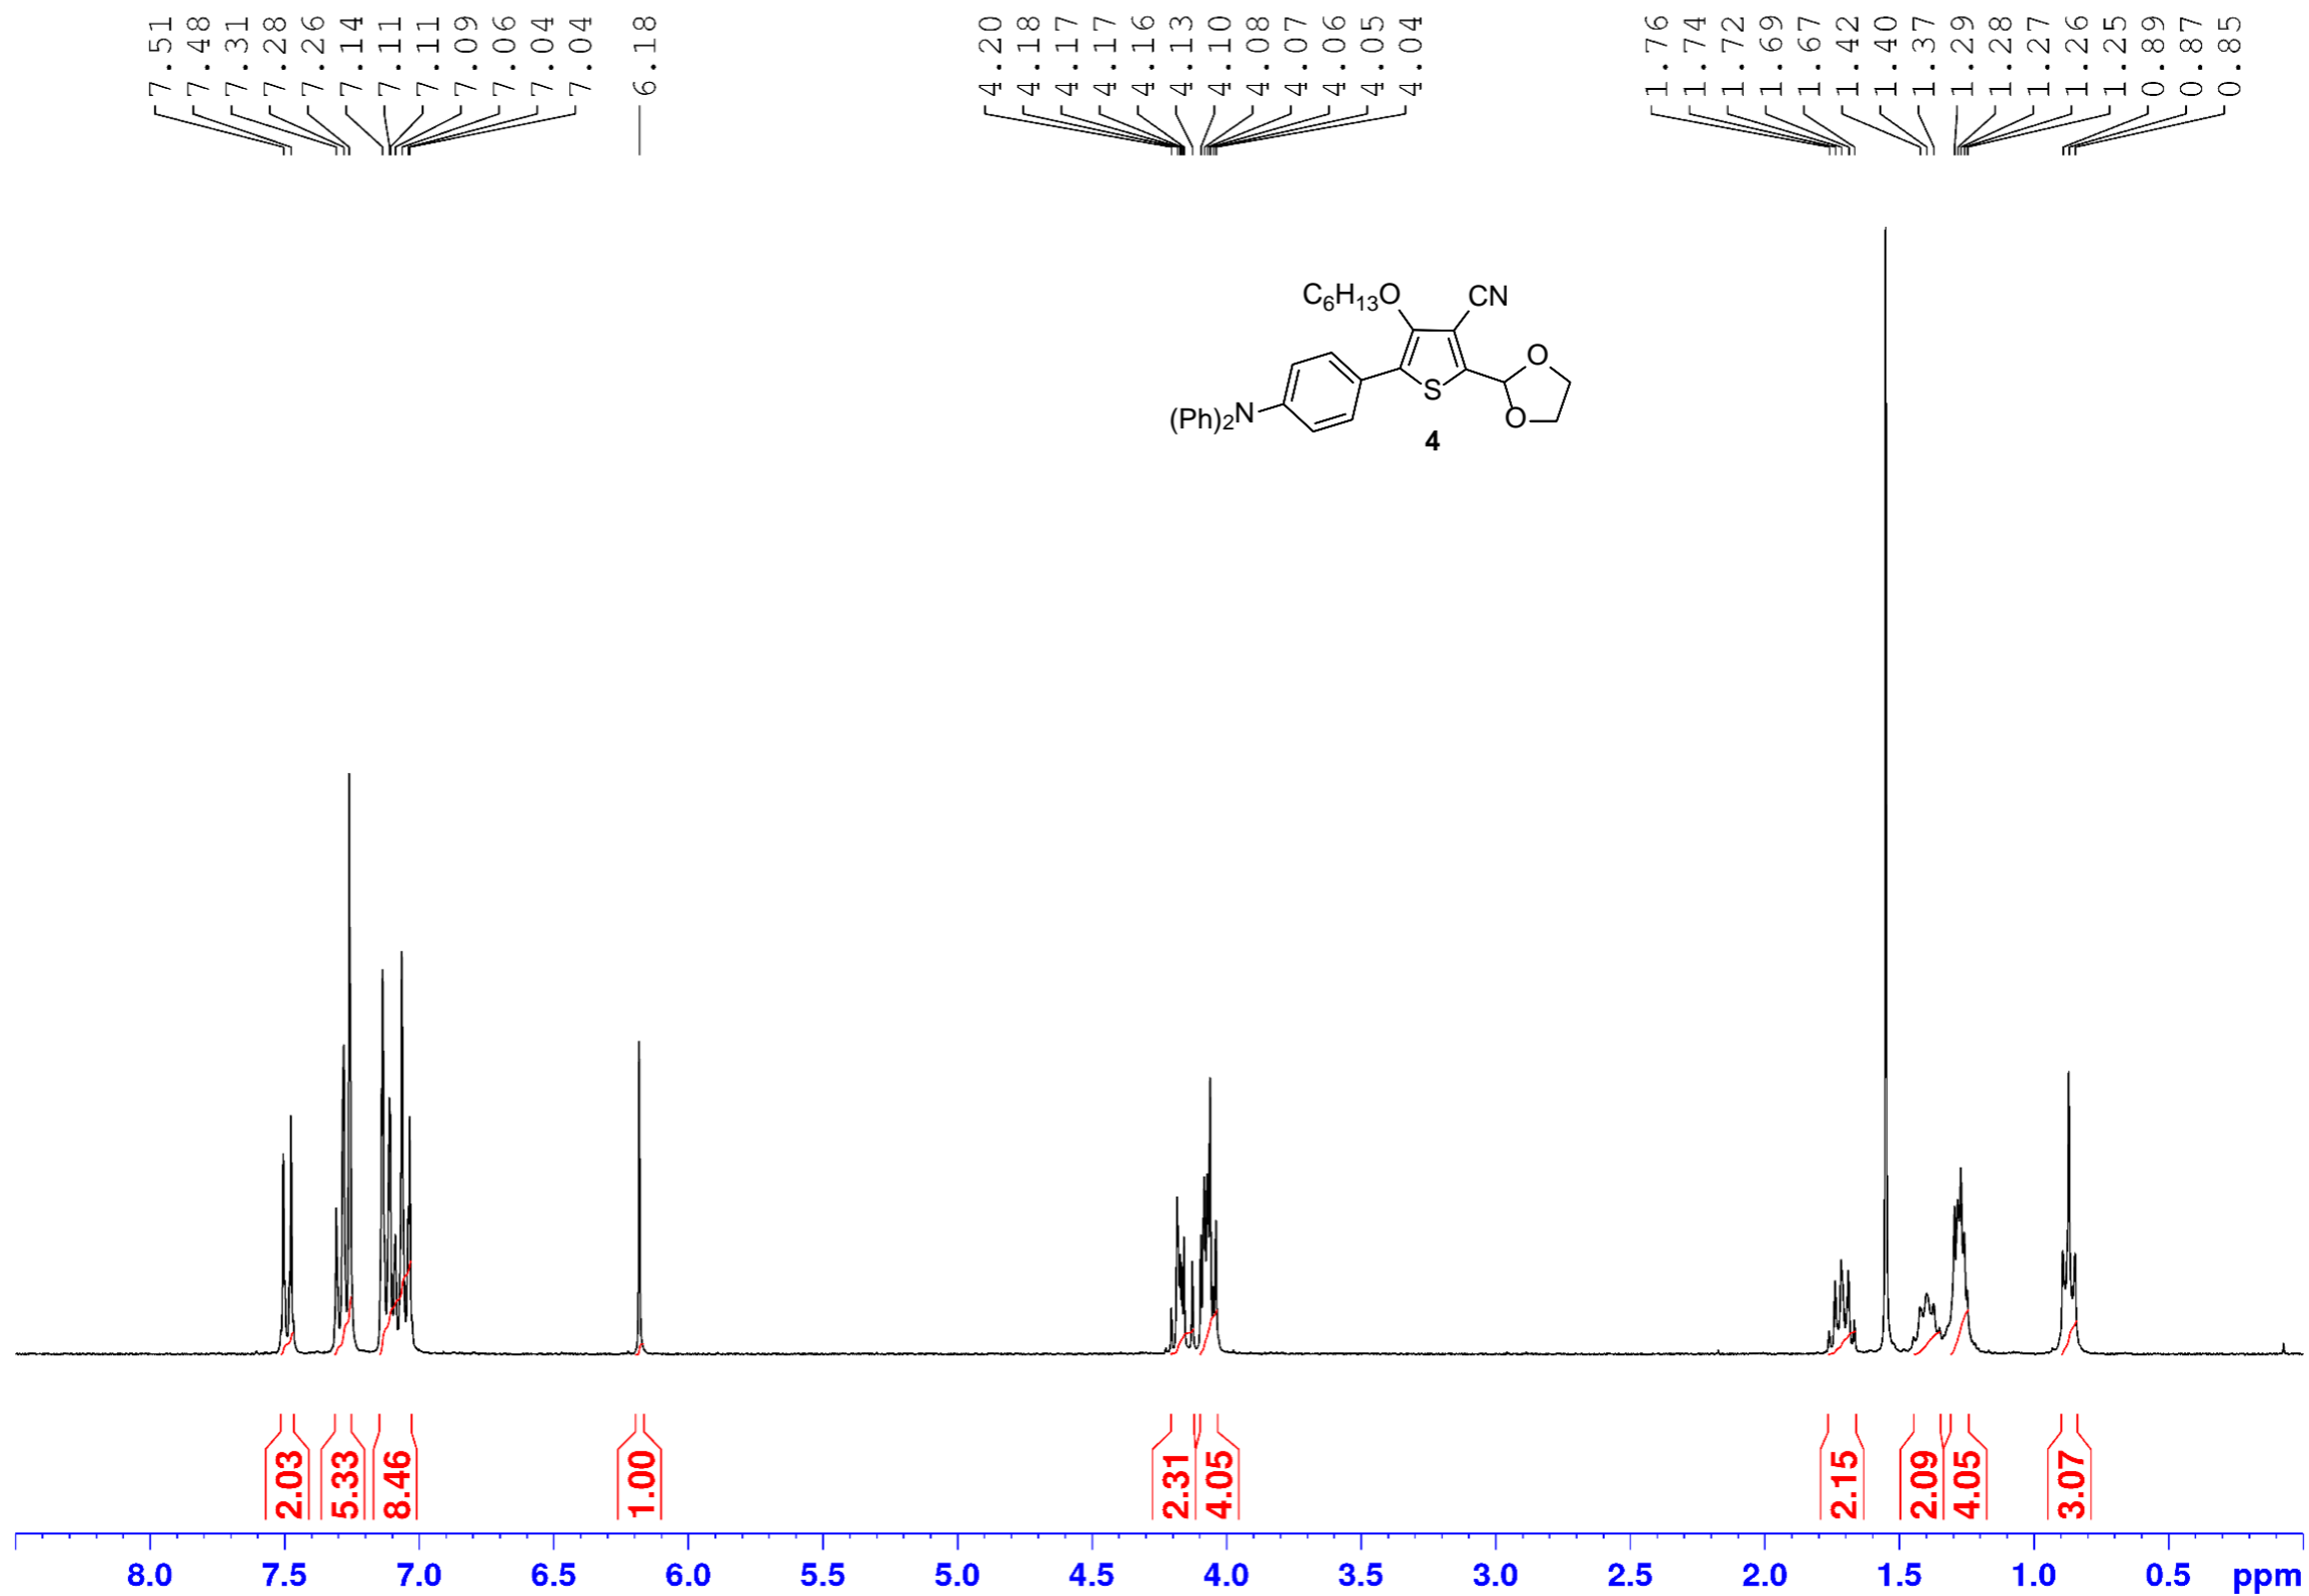

Figure S9 : <sup>1</sup>H NMR spectra in CDCl<sub>3</sub> of **4**

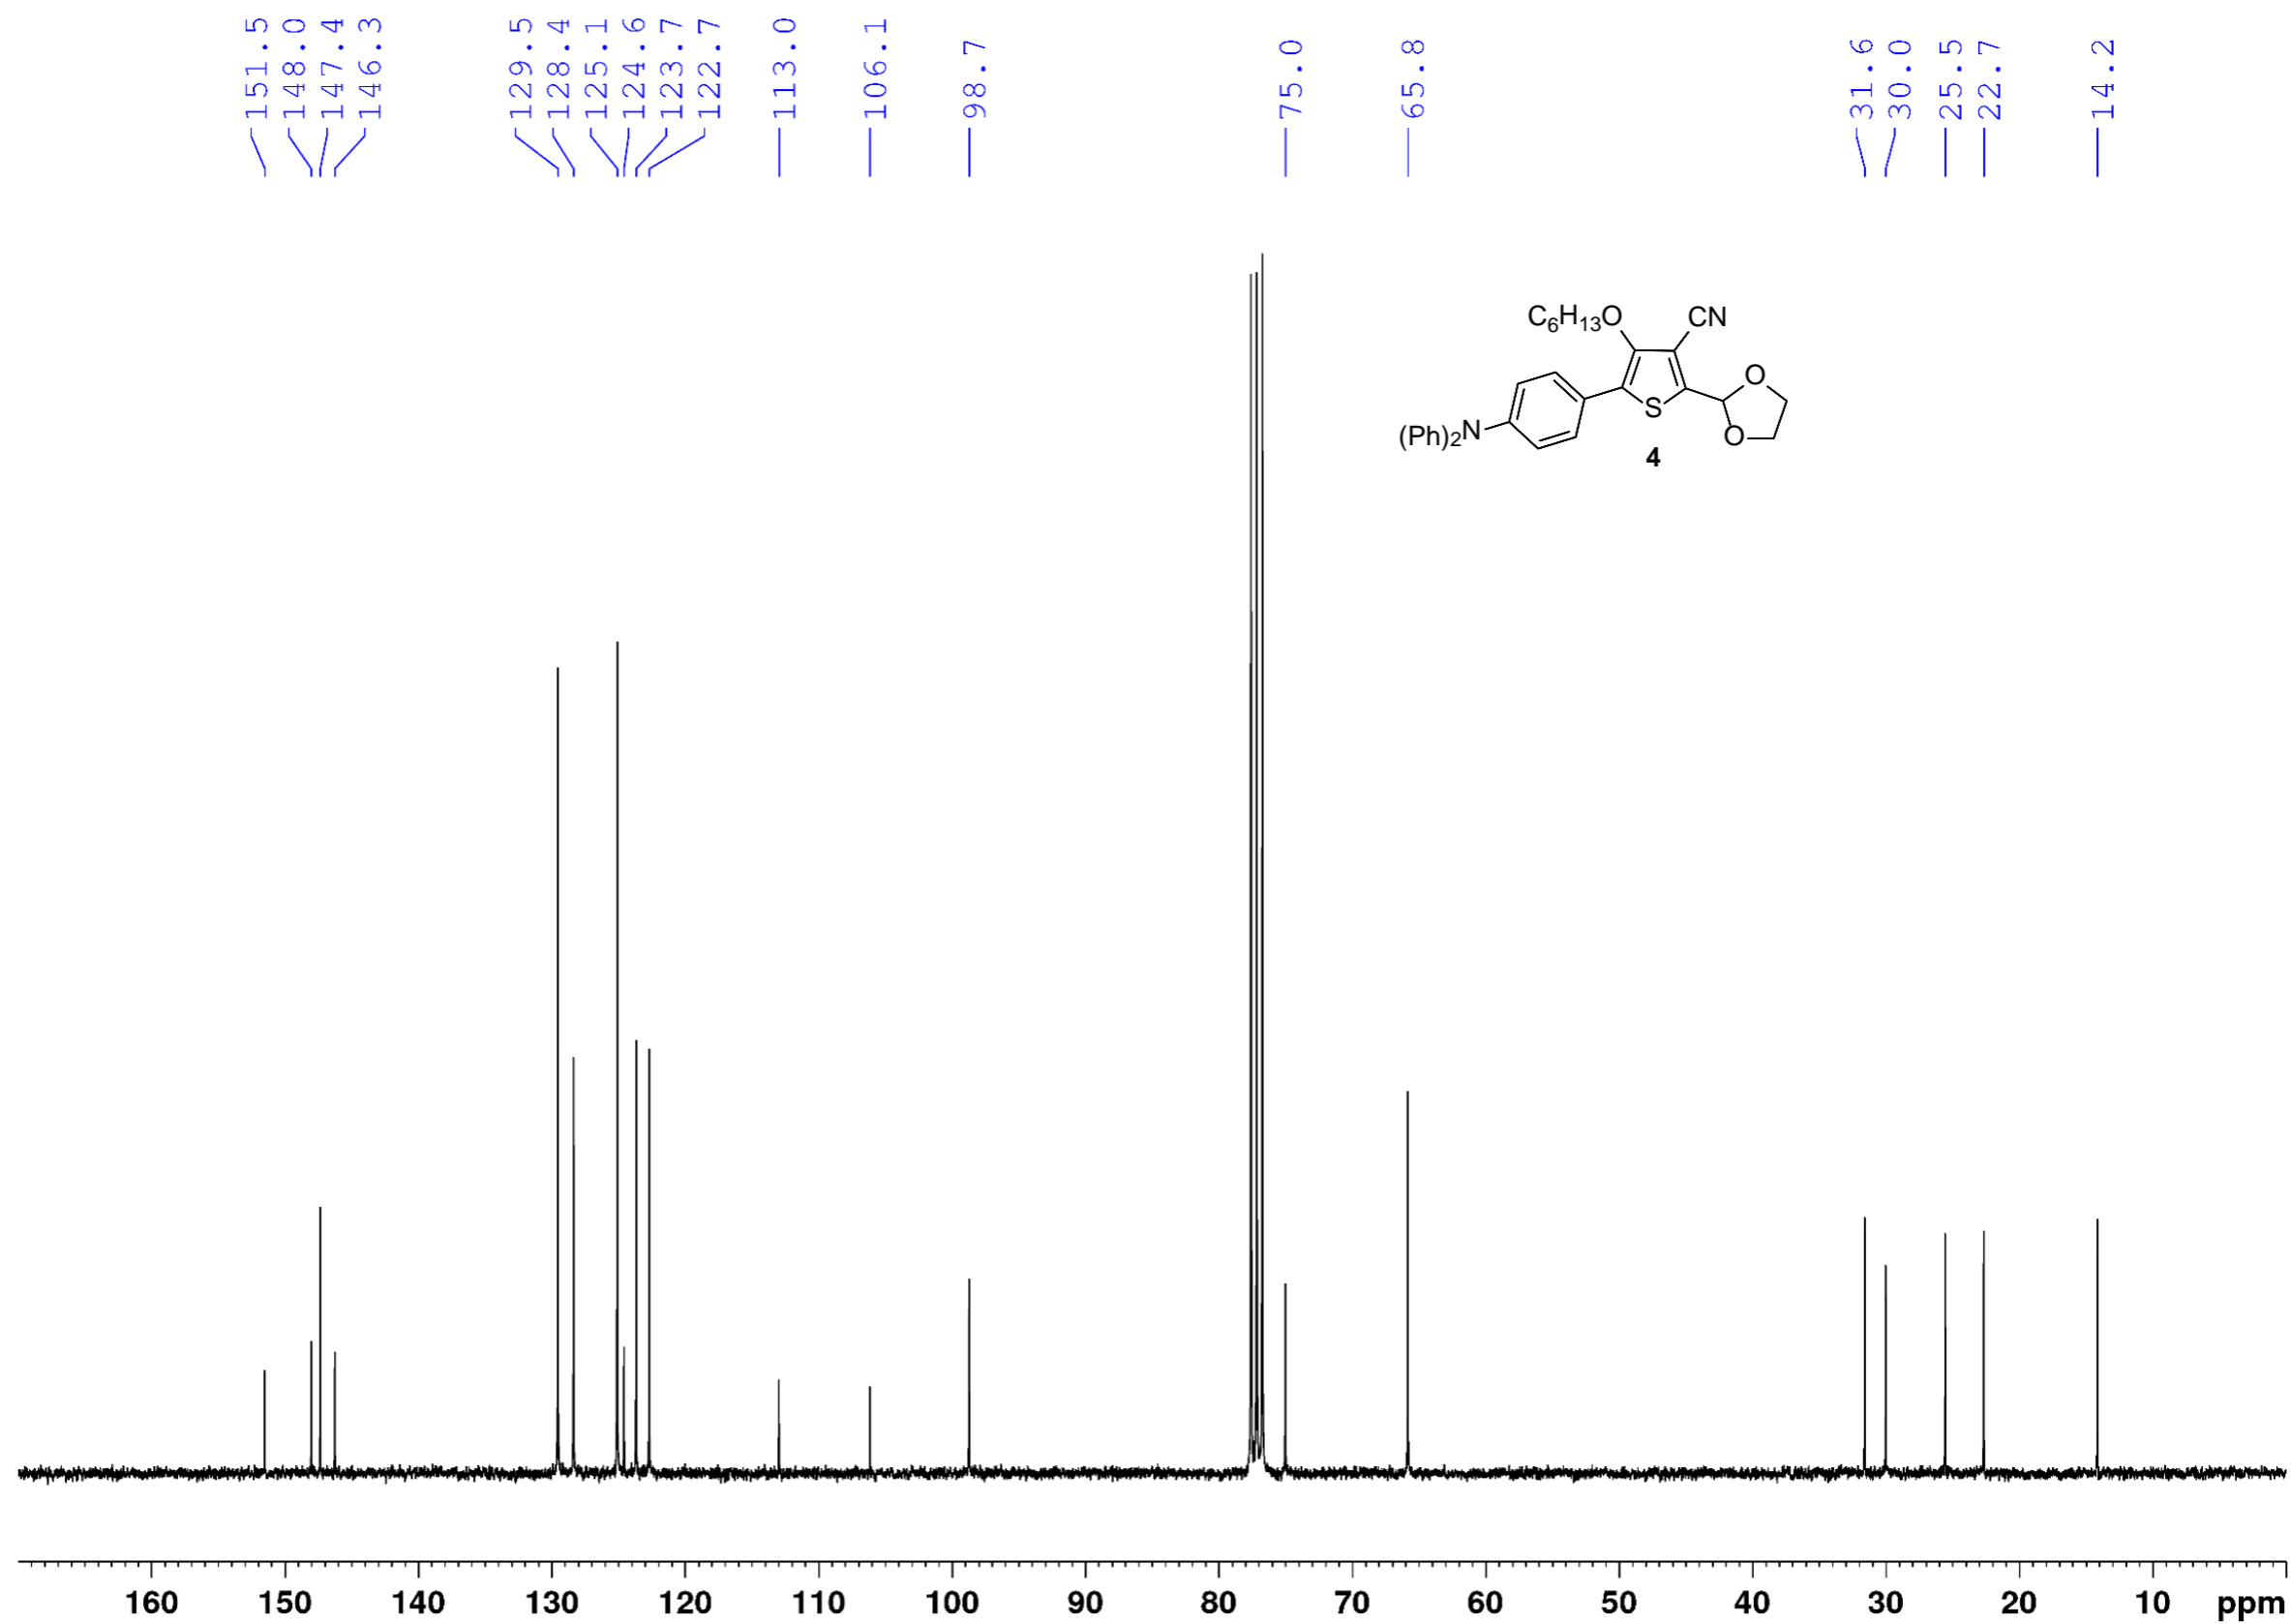

Figure S10 : <sup>13</sup>C NMR spectra in CDCl<sub>3</sub> of **4**

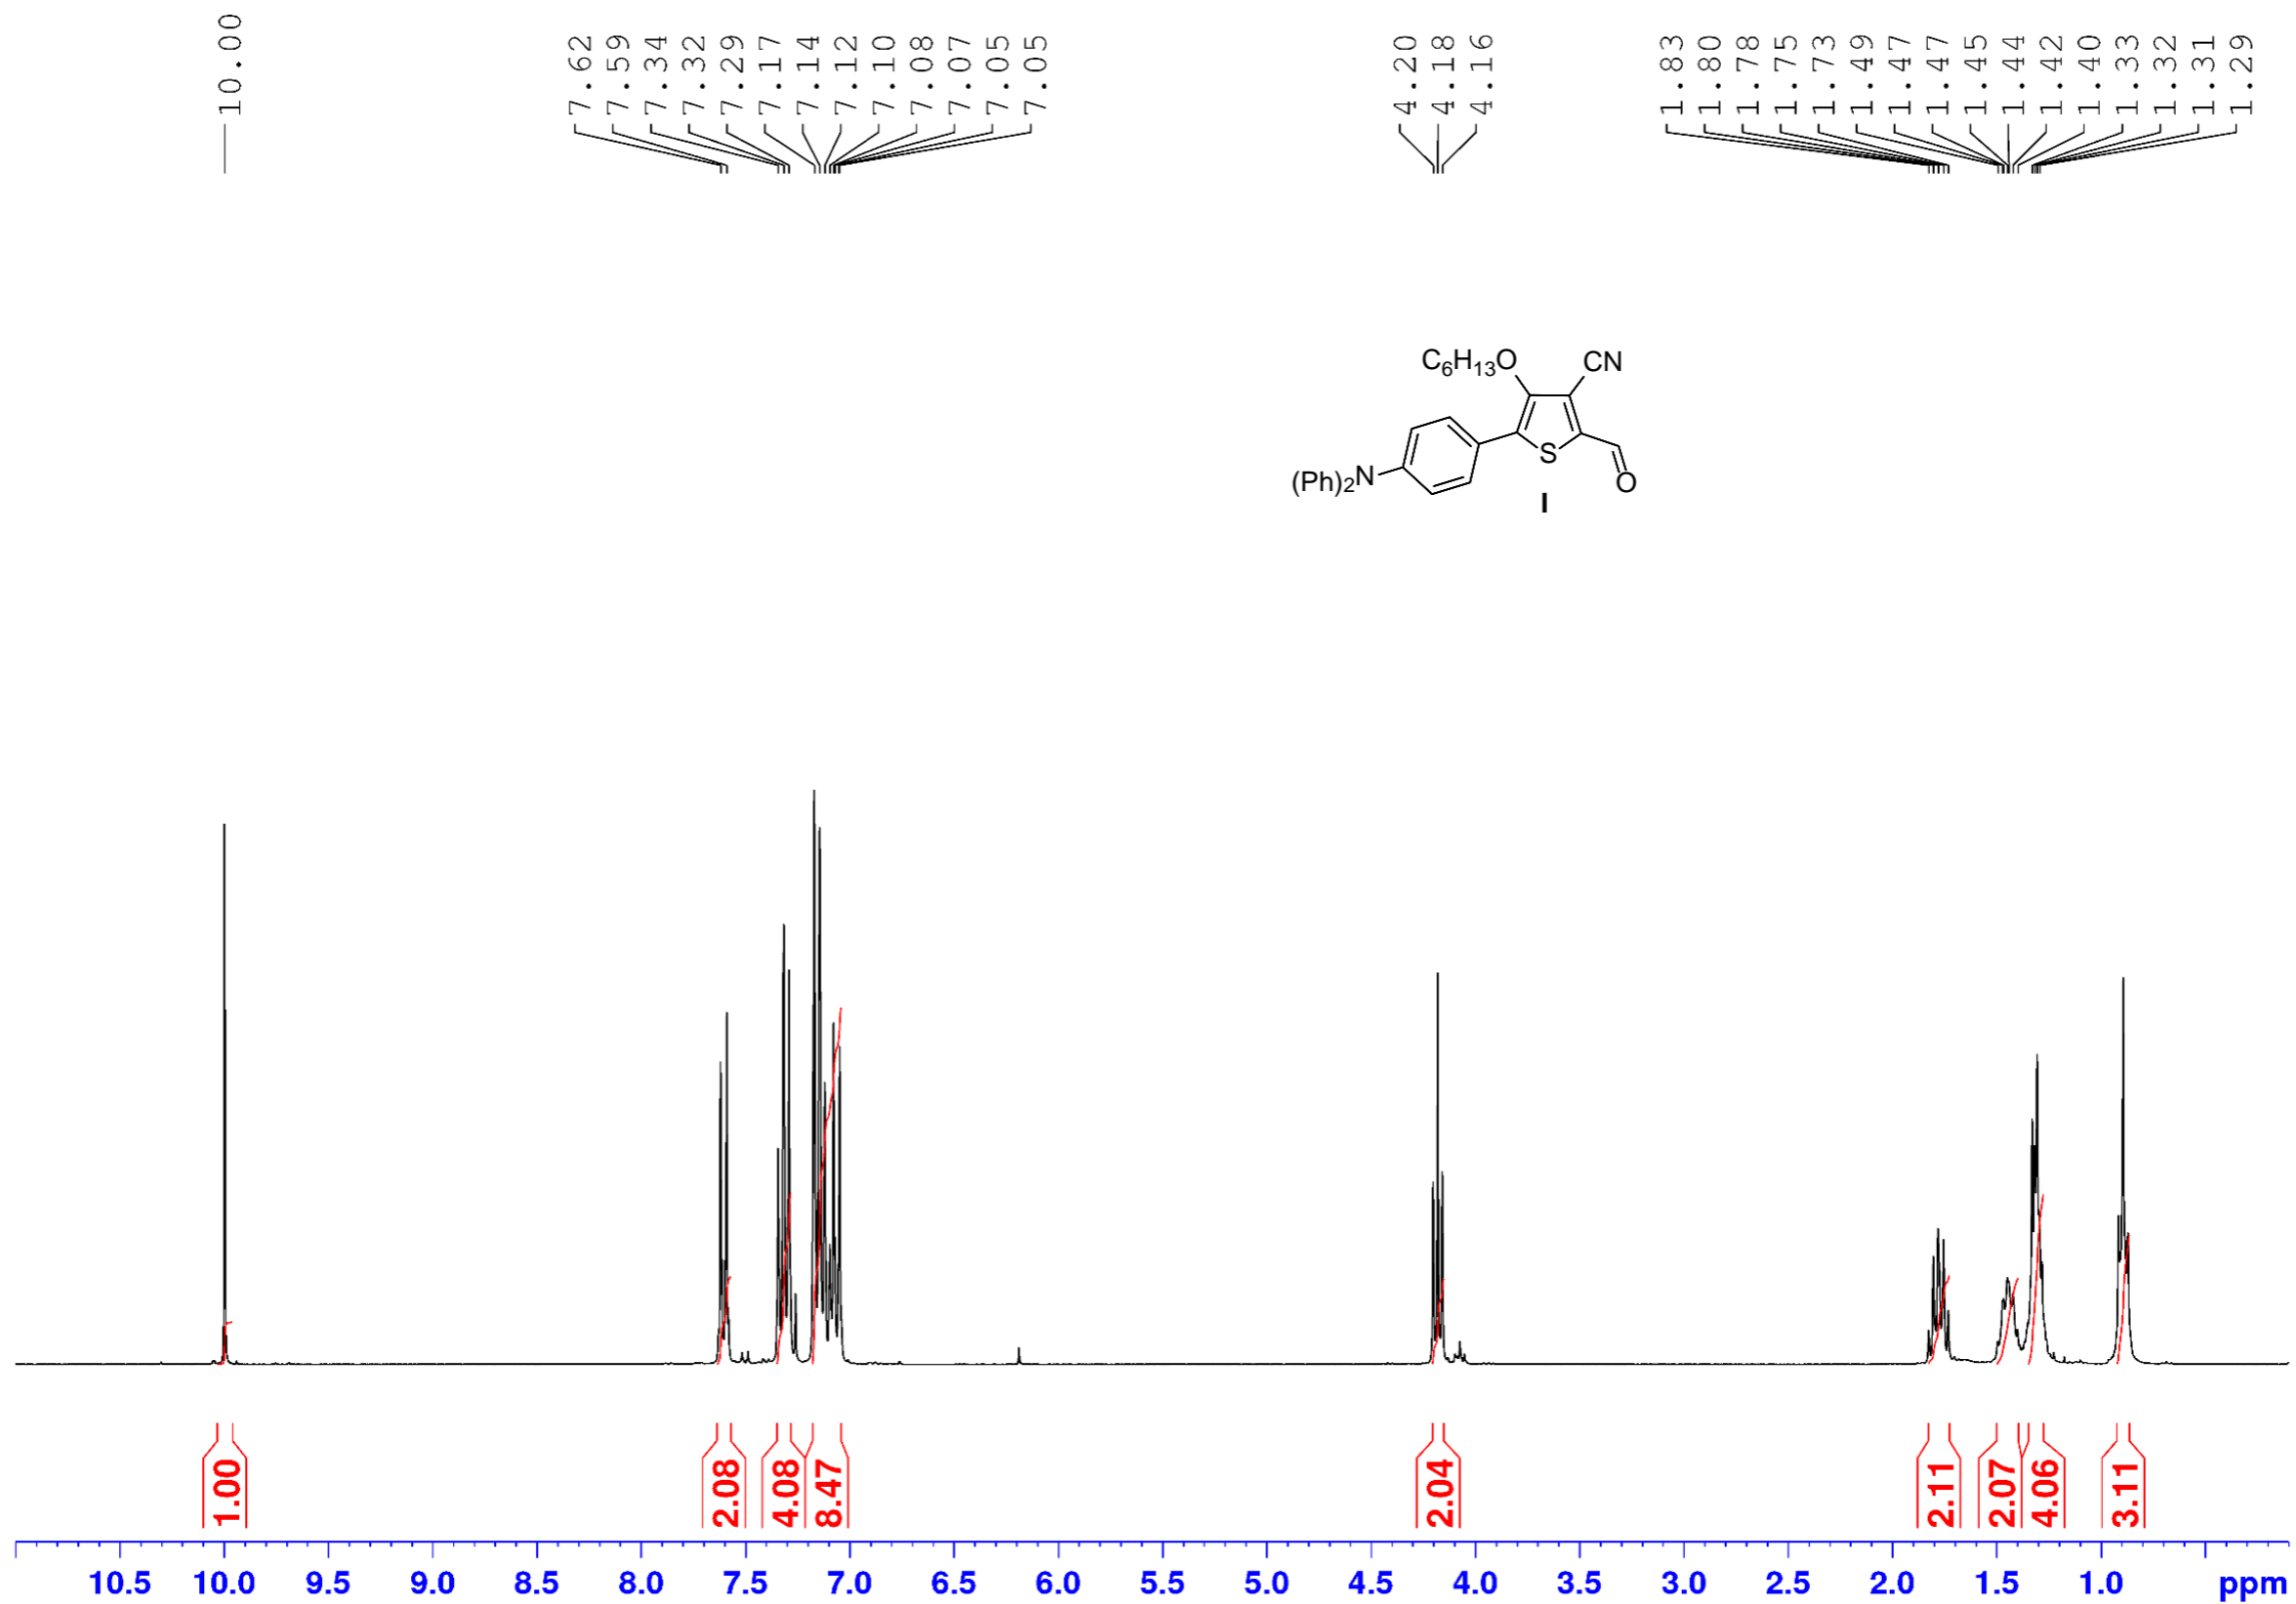

Figure S11 :  $^1\text{H}$  NMR spectra in  $\text{CDCl}_3$  of **I**

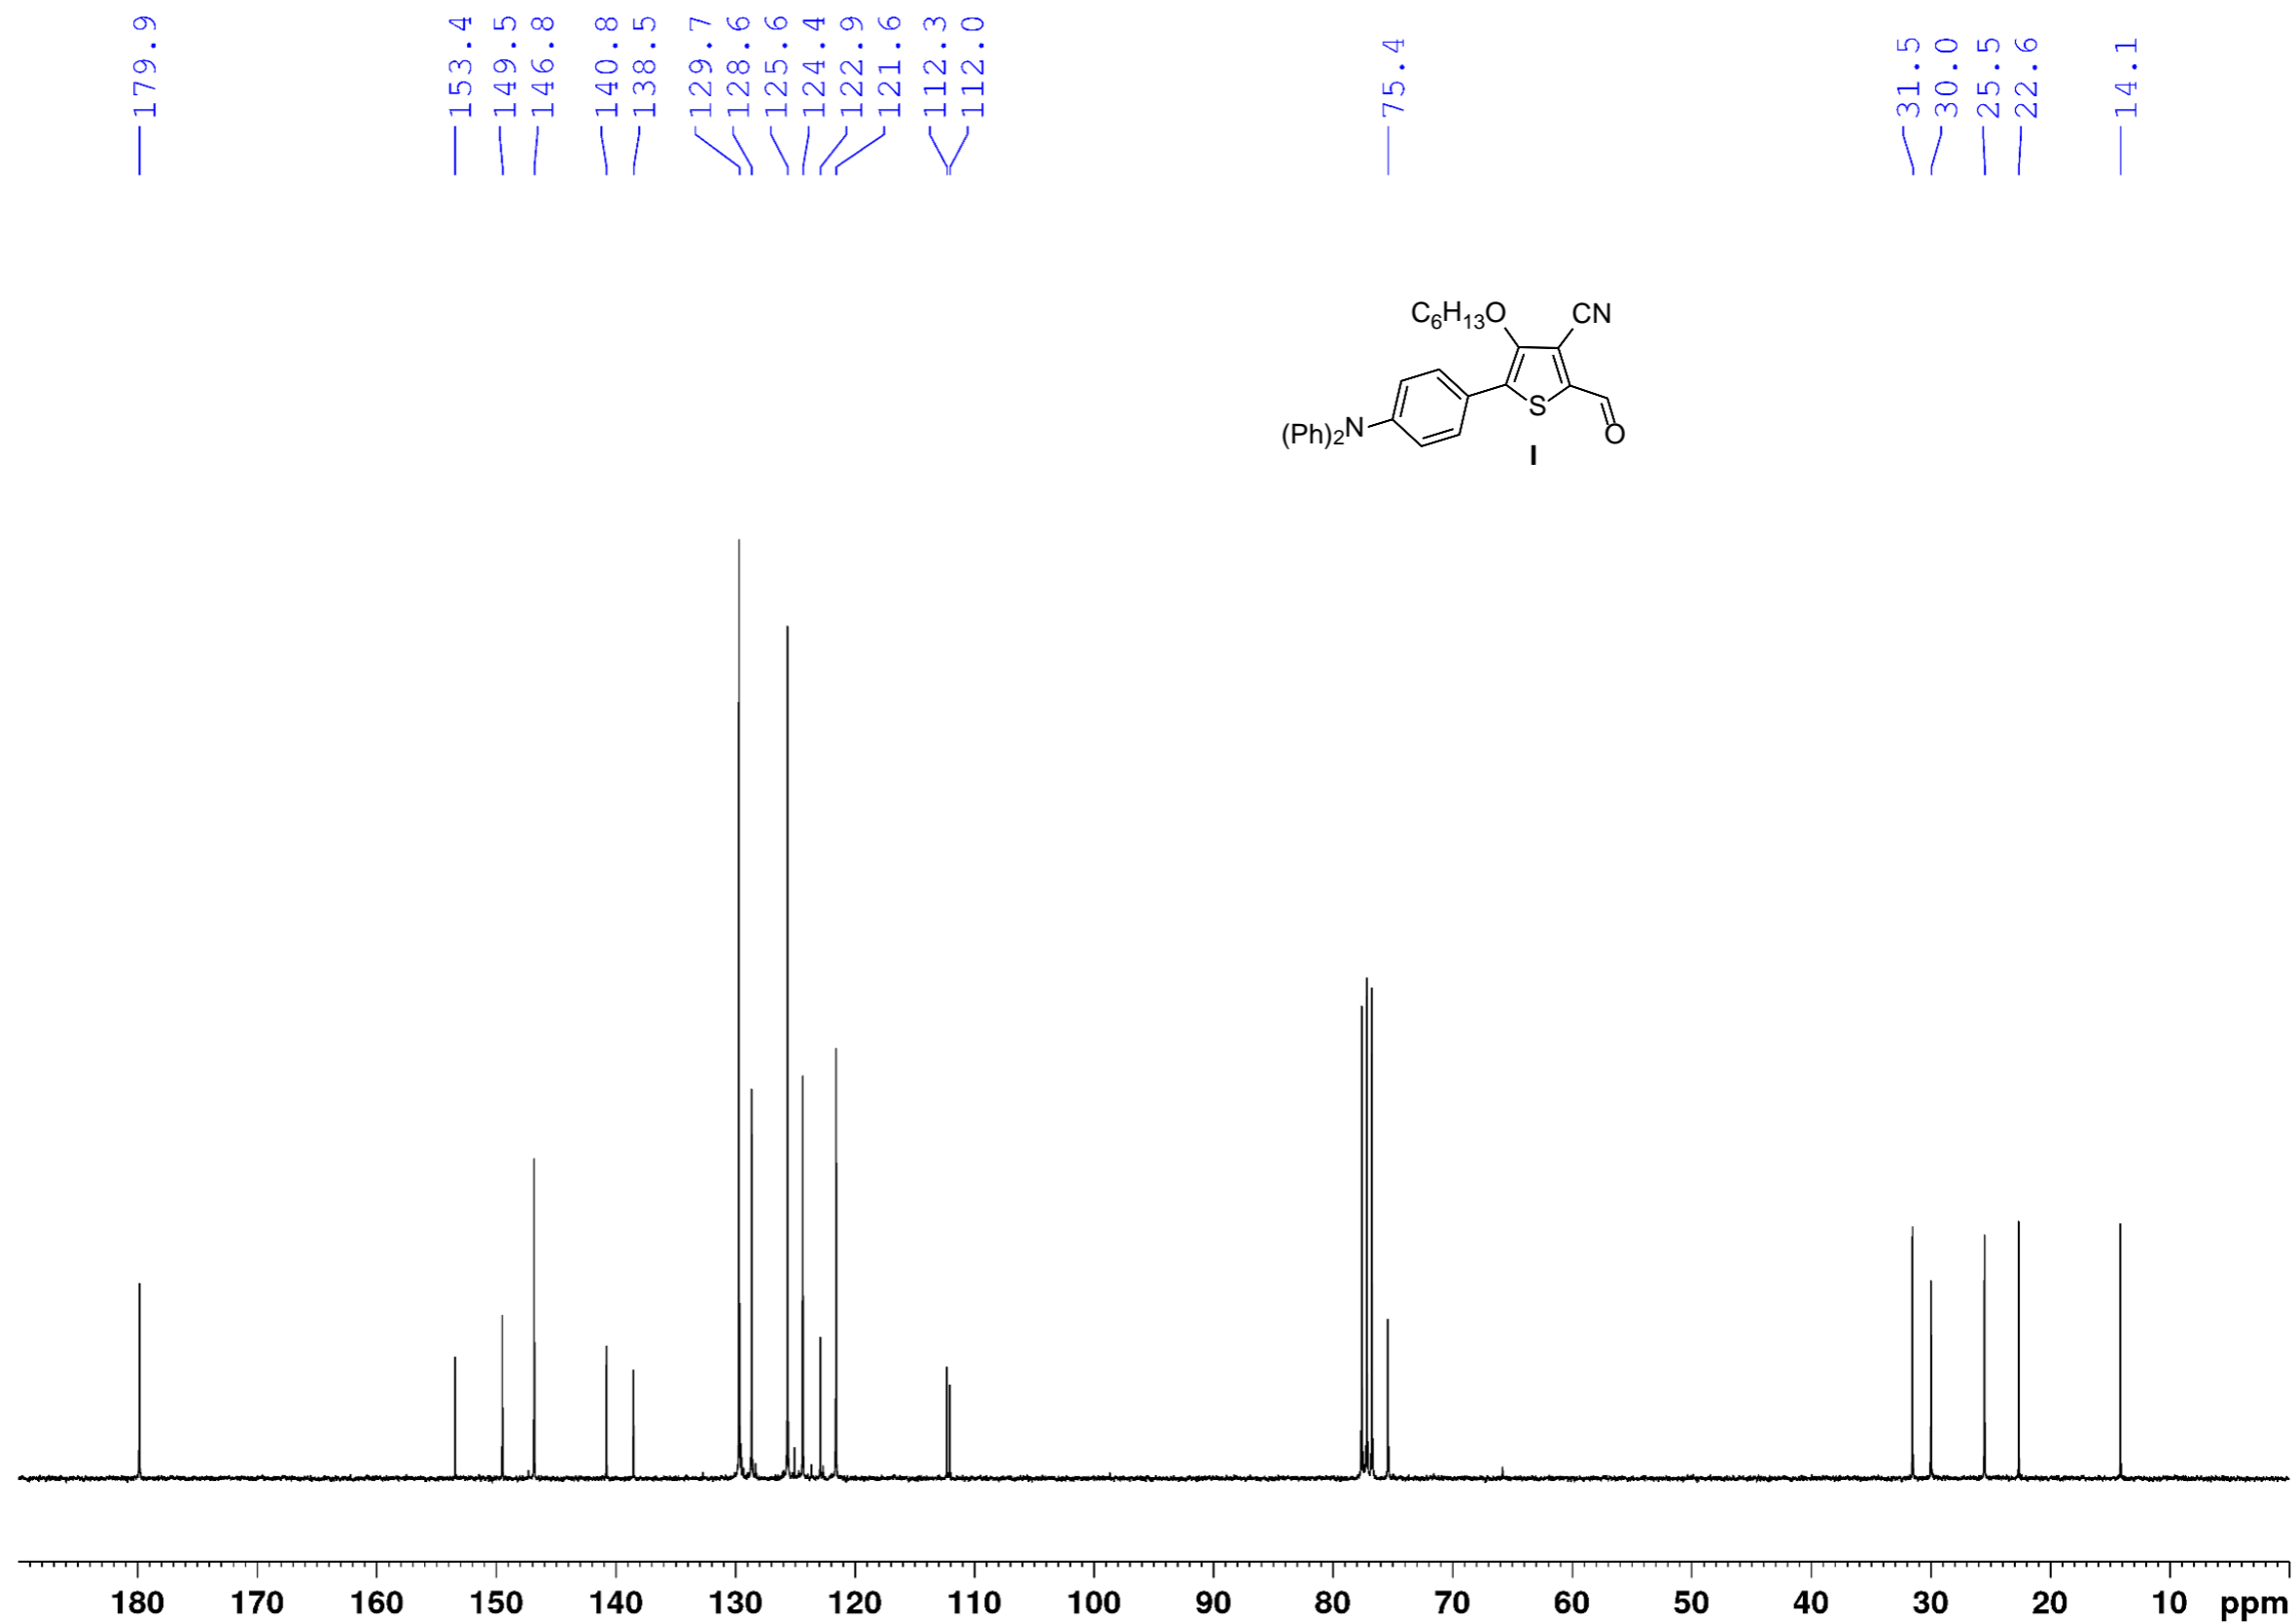

Figure S12 : <sup>13</sup>C NMR spectra in CDCl<sub>3</sub> of I

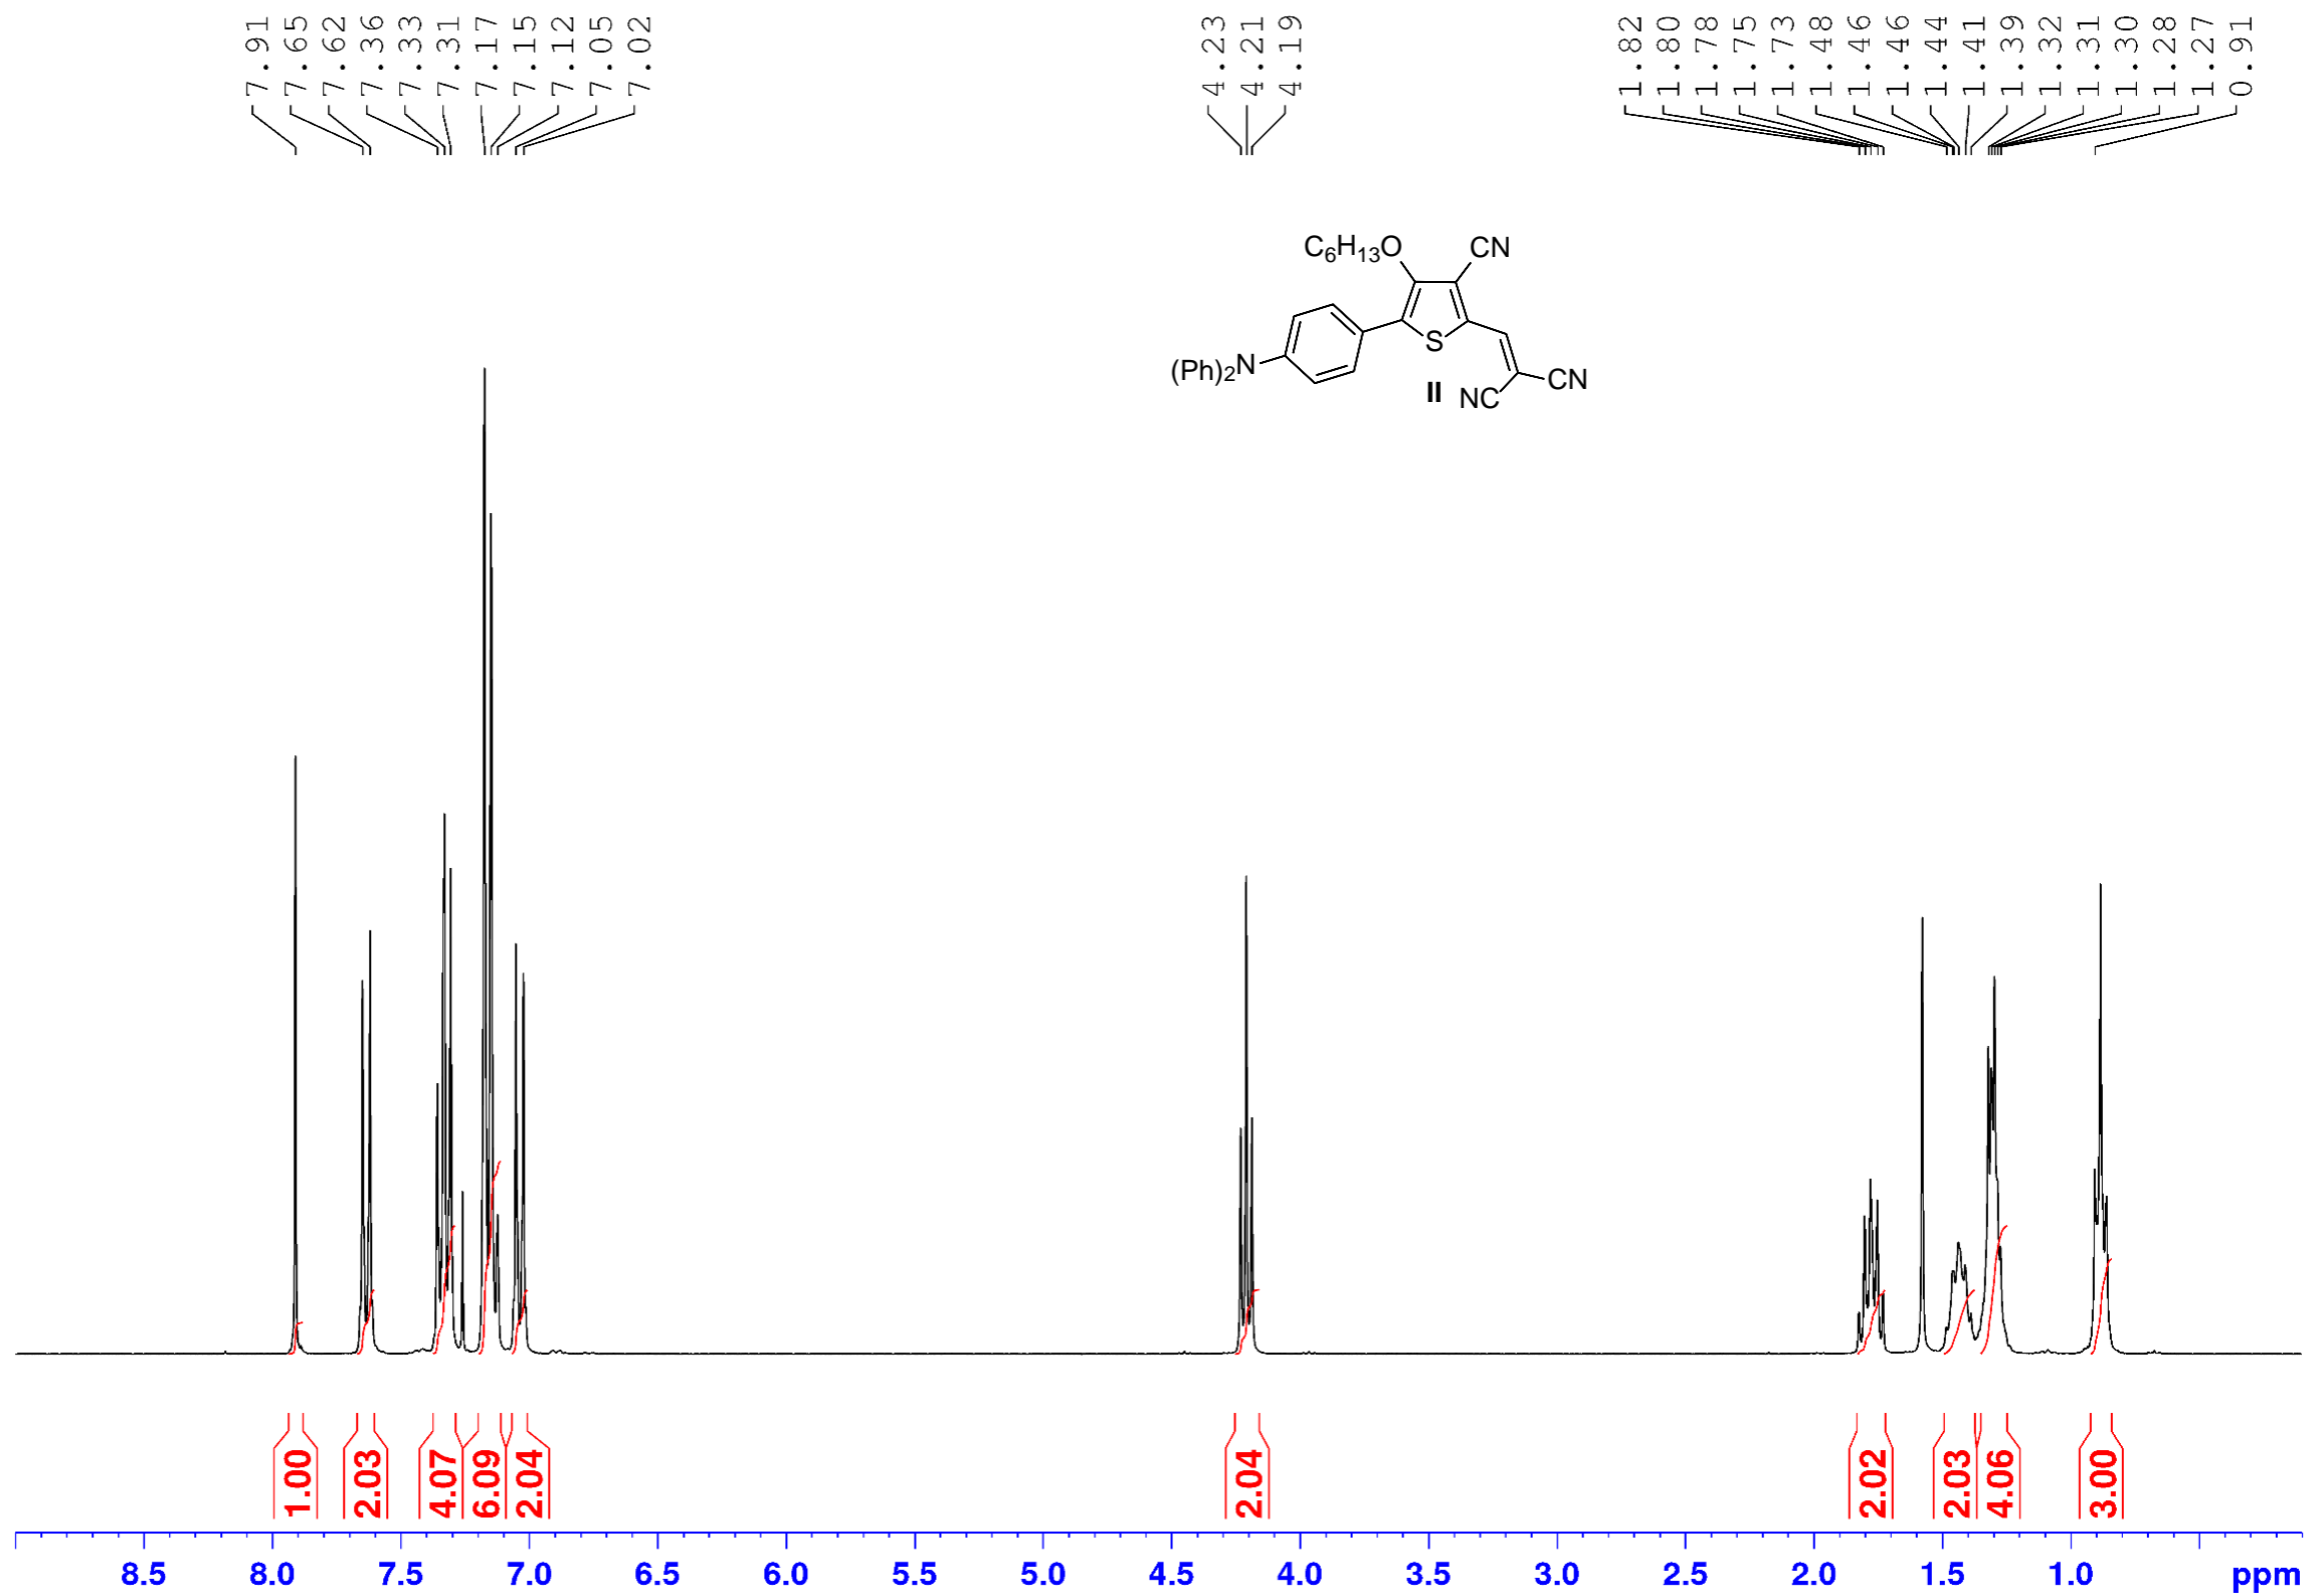

Figure S13 :  $^1\text{H}$  NMR spectra in  $\text{CDCl}_3$  of II



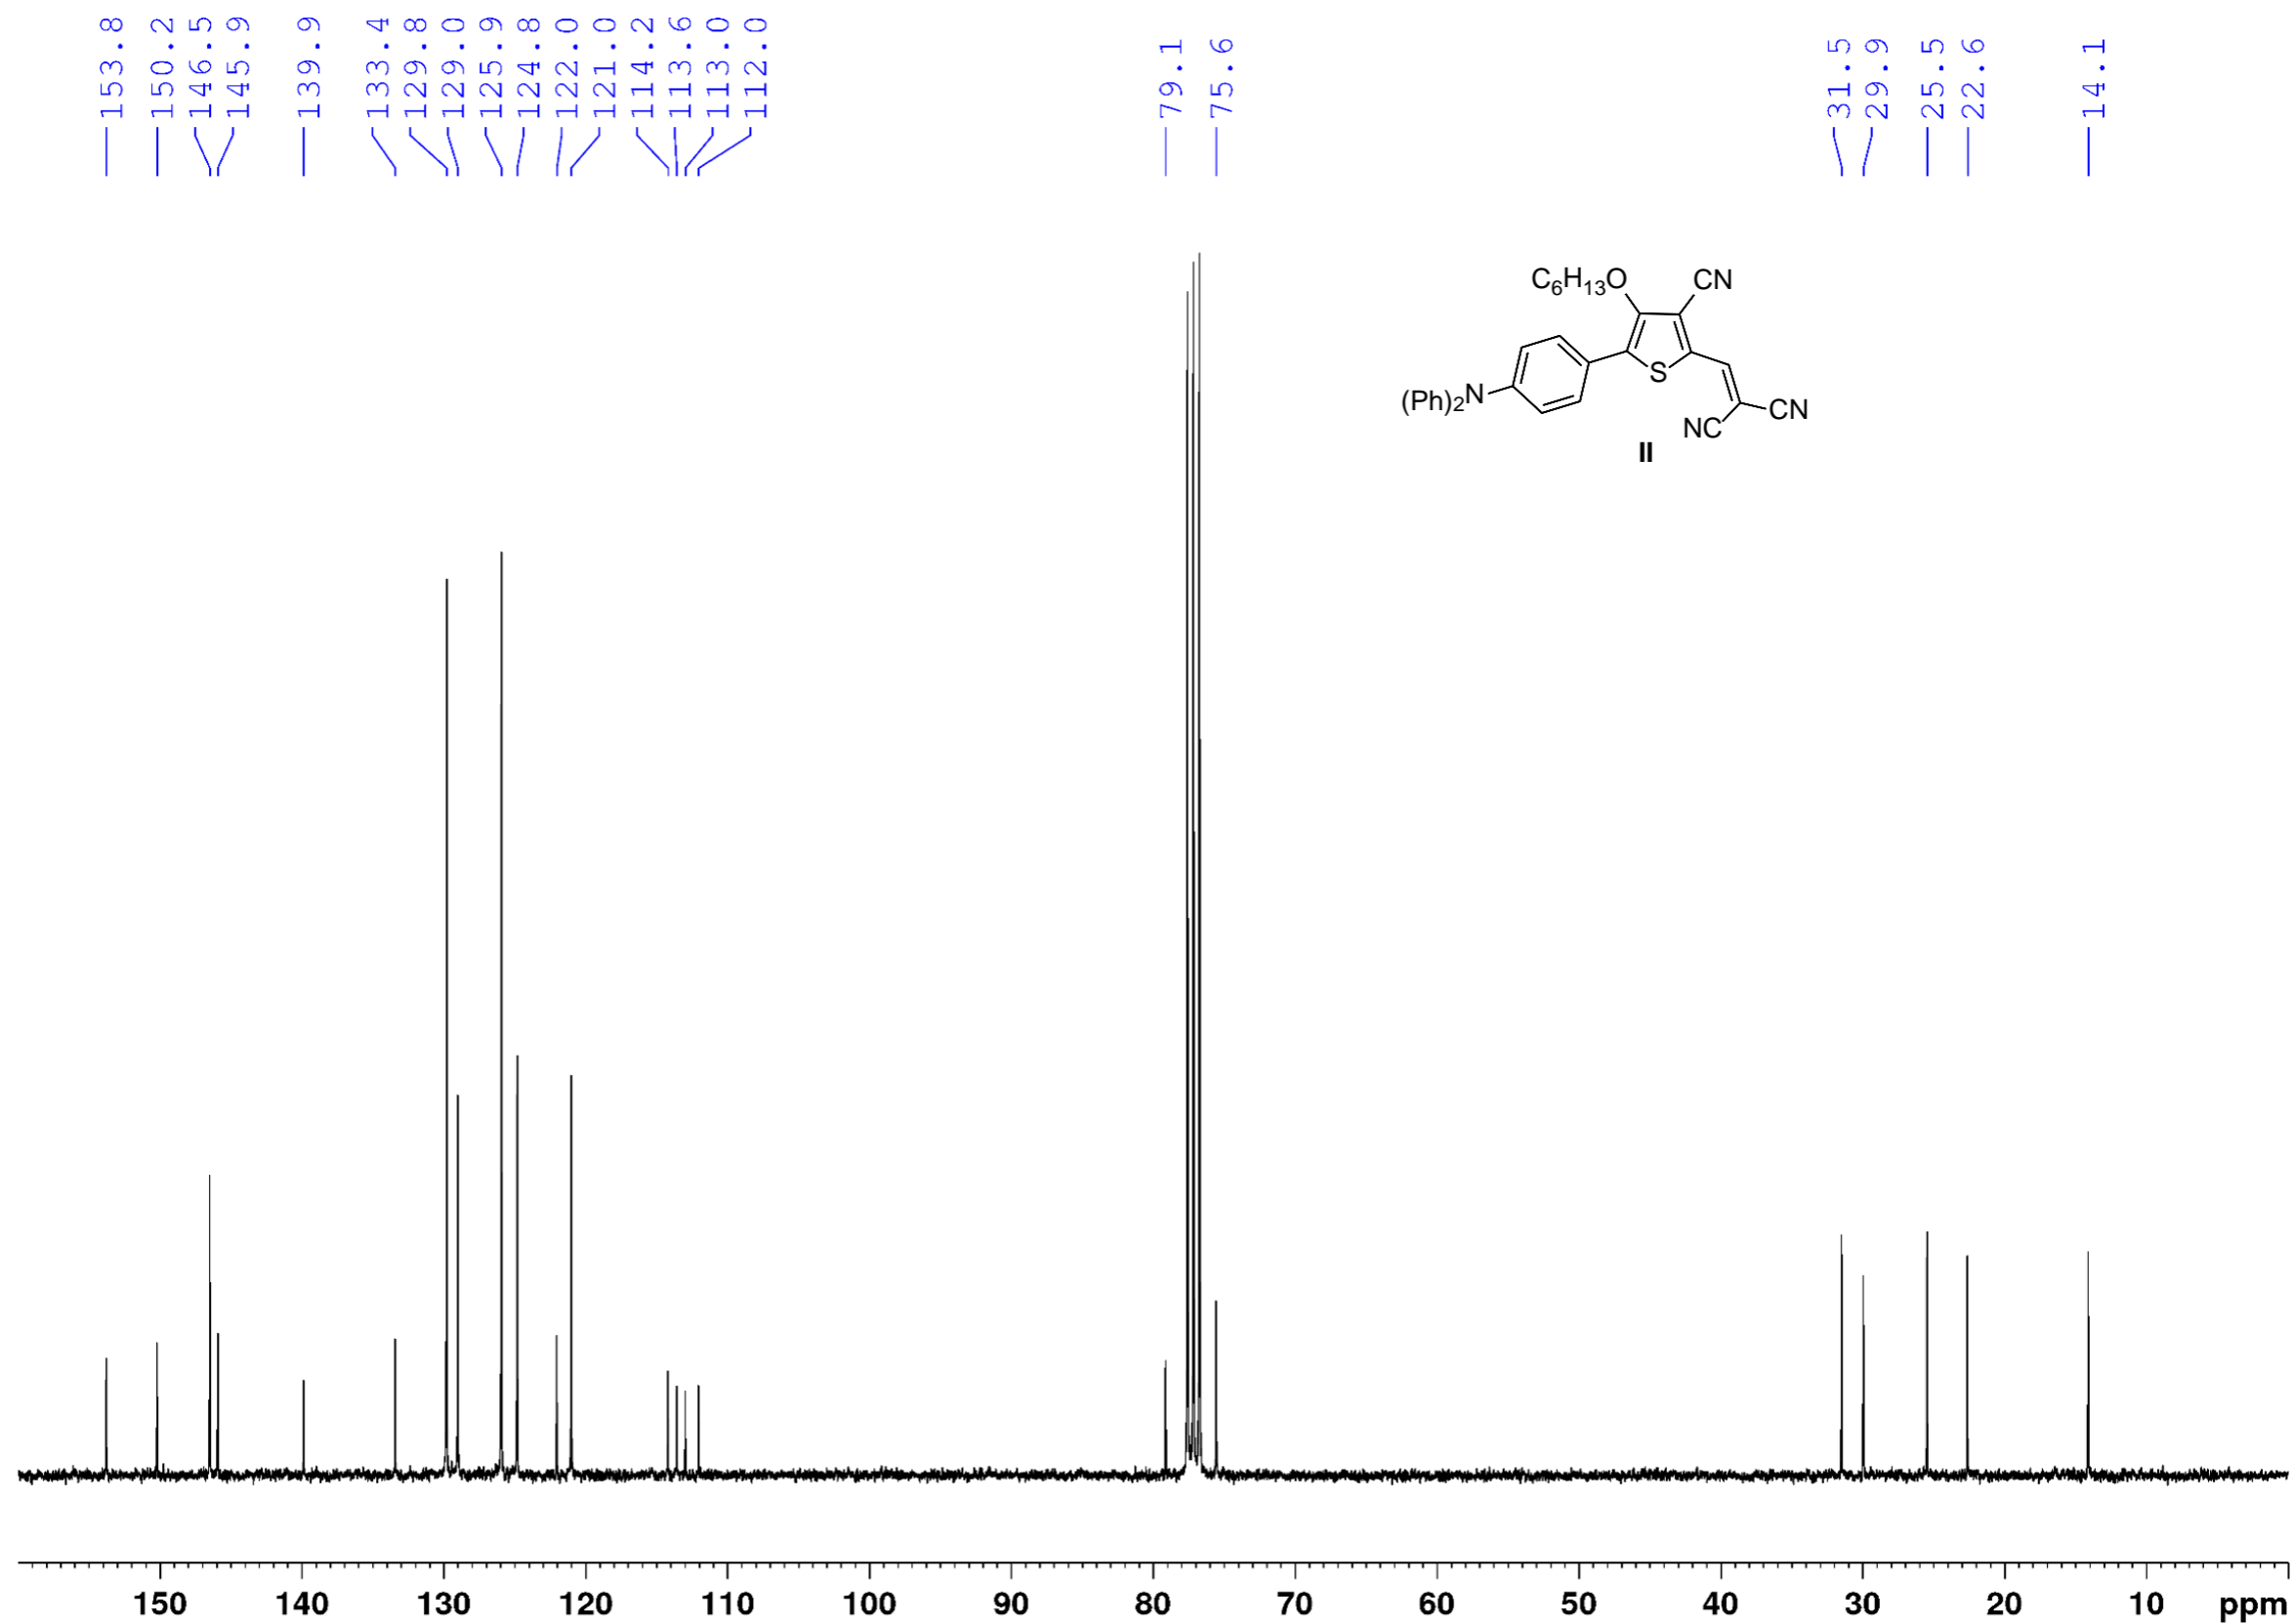

**Figure S14 :**  $^{13}\text{C}$  NMR spectra in  $\text{CDCl}_3$  of **II**

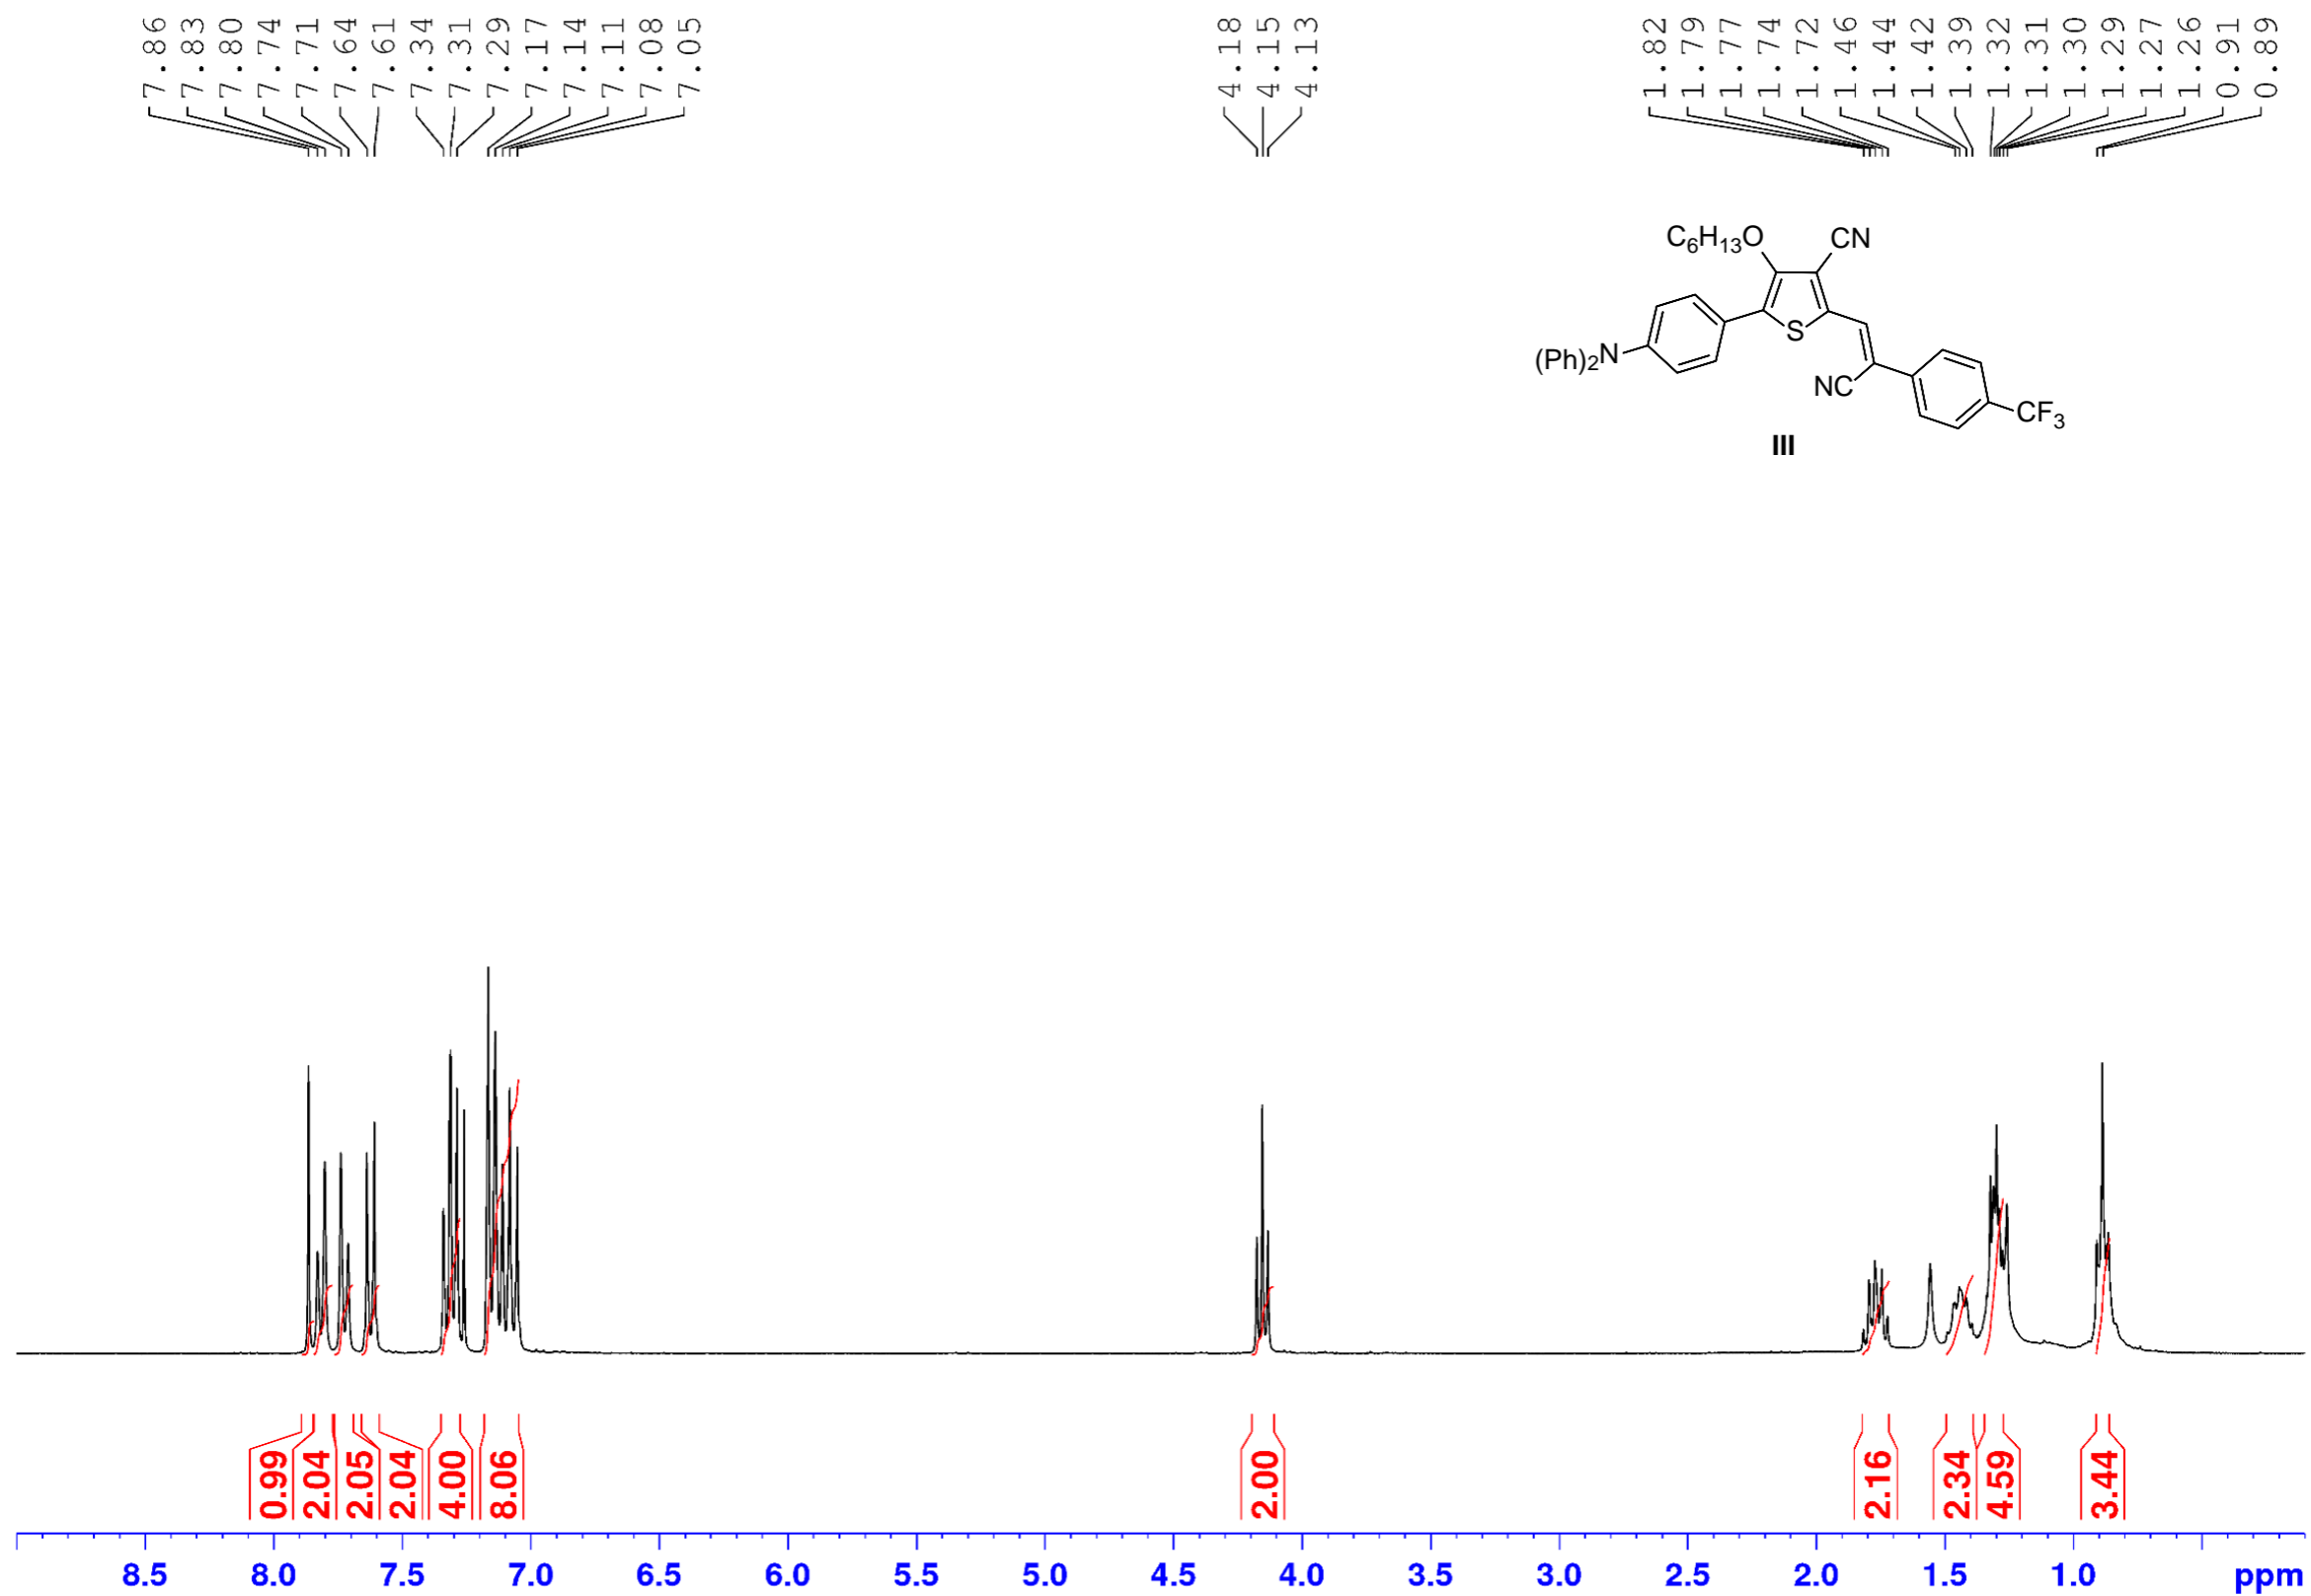

Figure S10 :  $^1H$  NMR spectra in  $CDCl_3$  of **III**

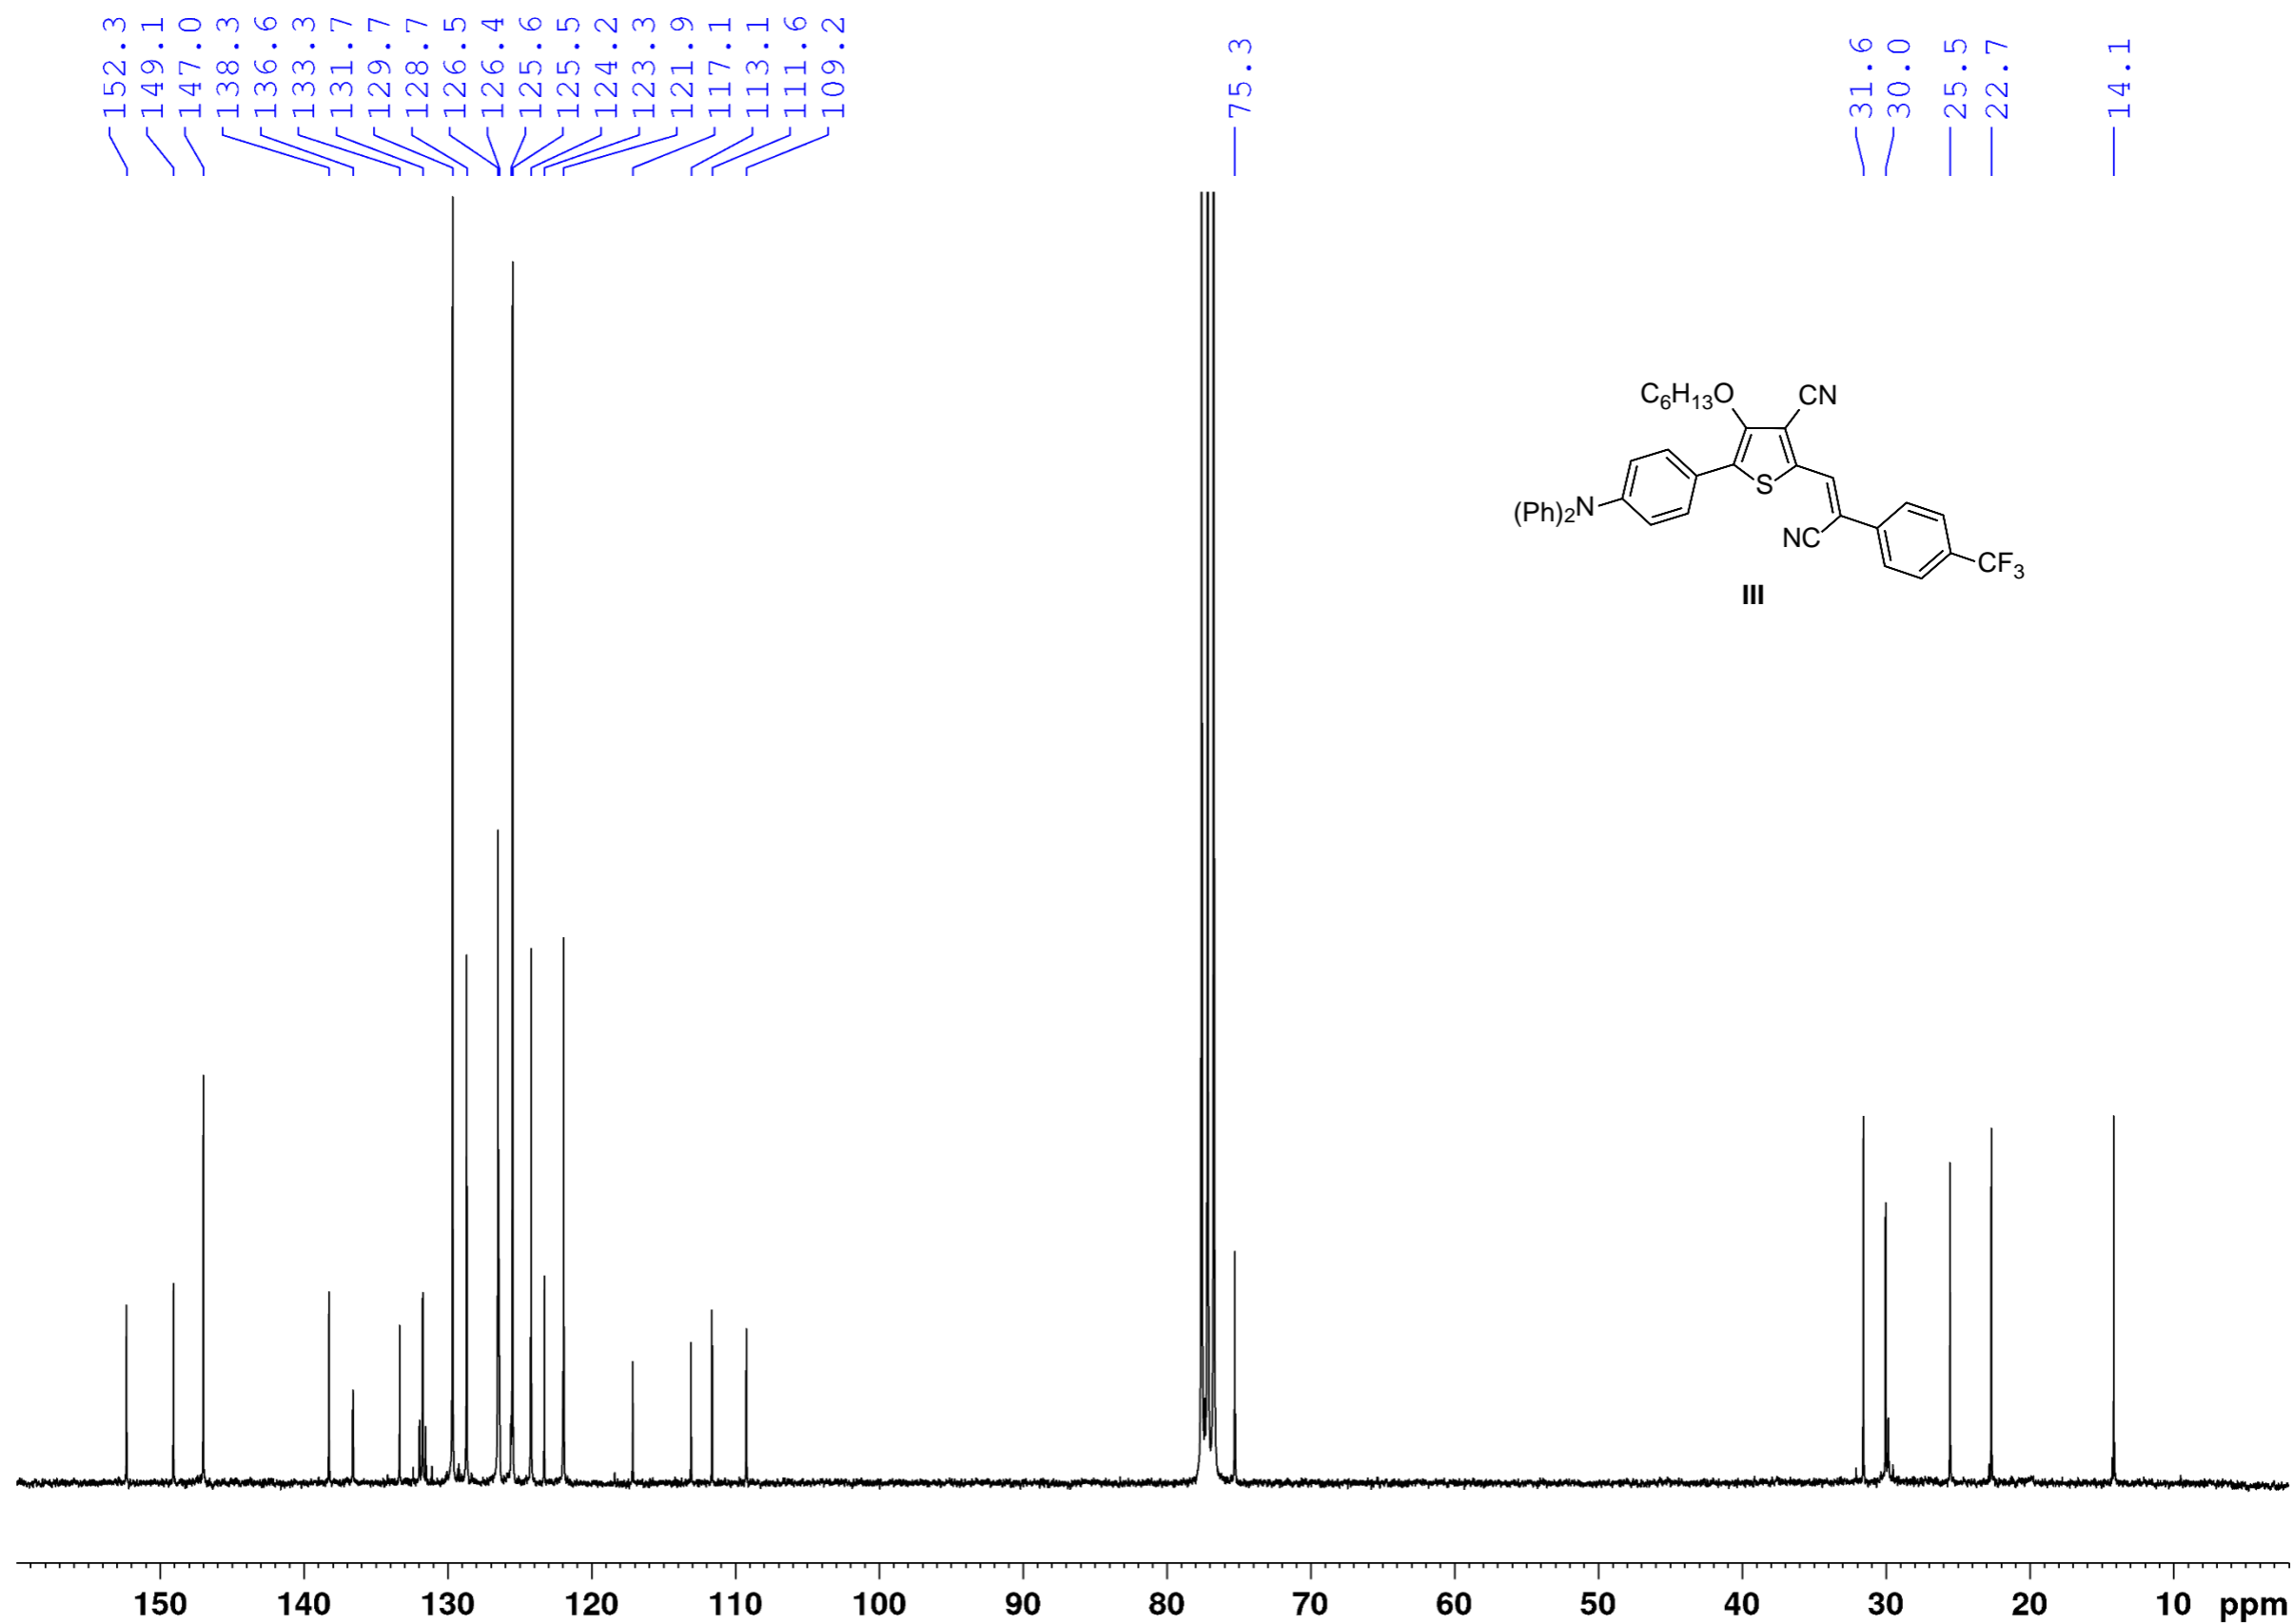

Figure S15 :  $^{13}\text{C}$  NMR spectra in  $\text{CDCl}_3$  of **III**

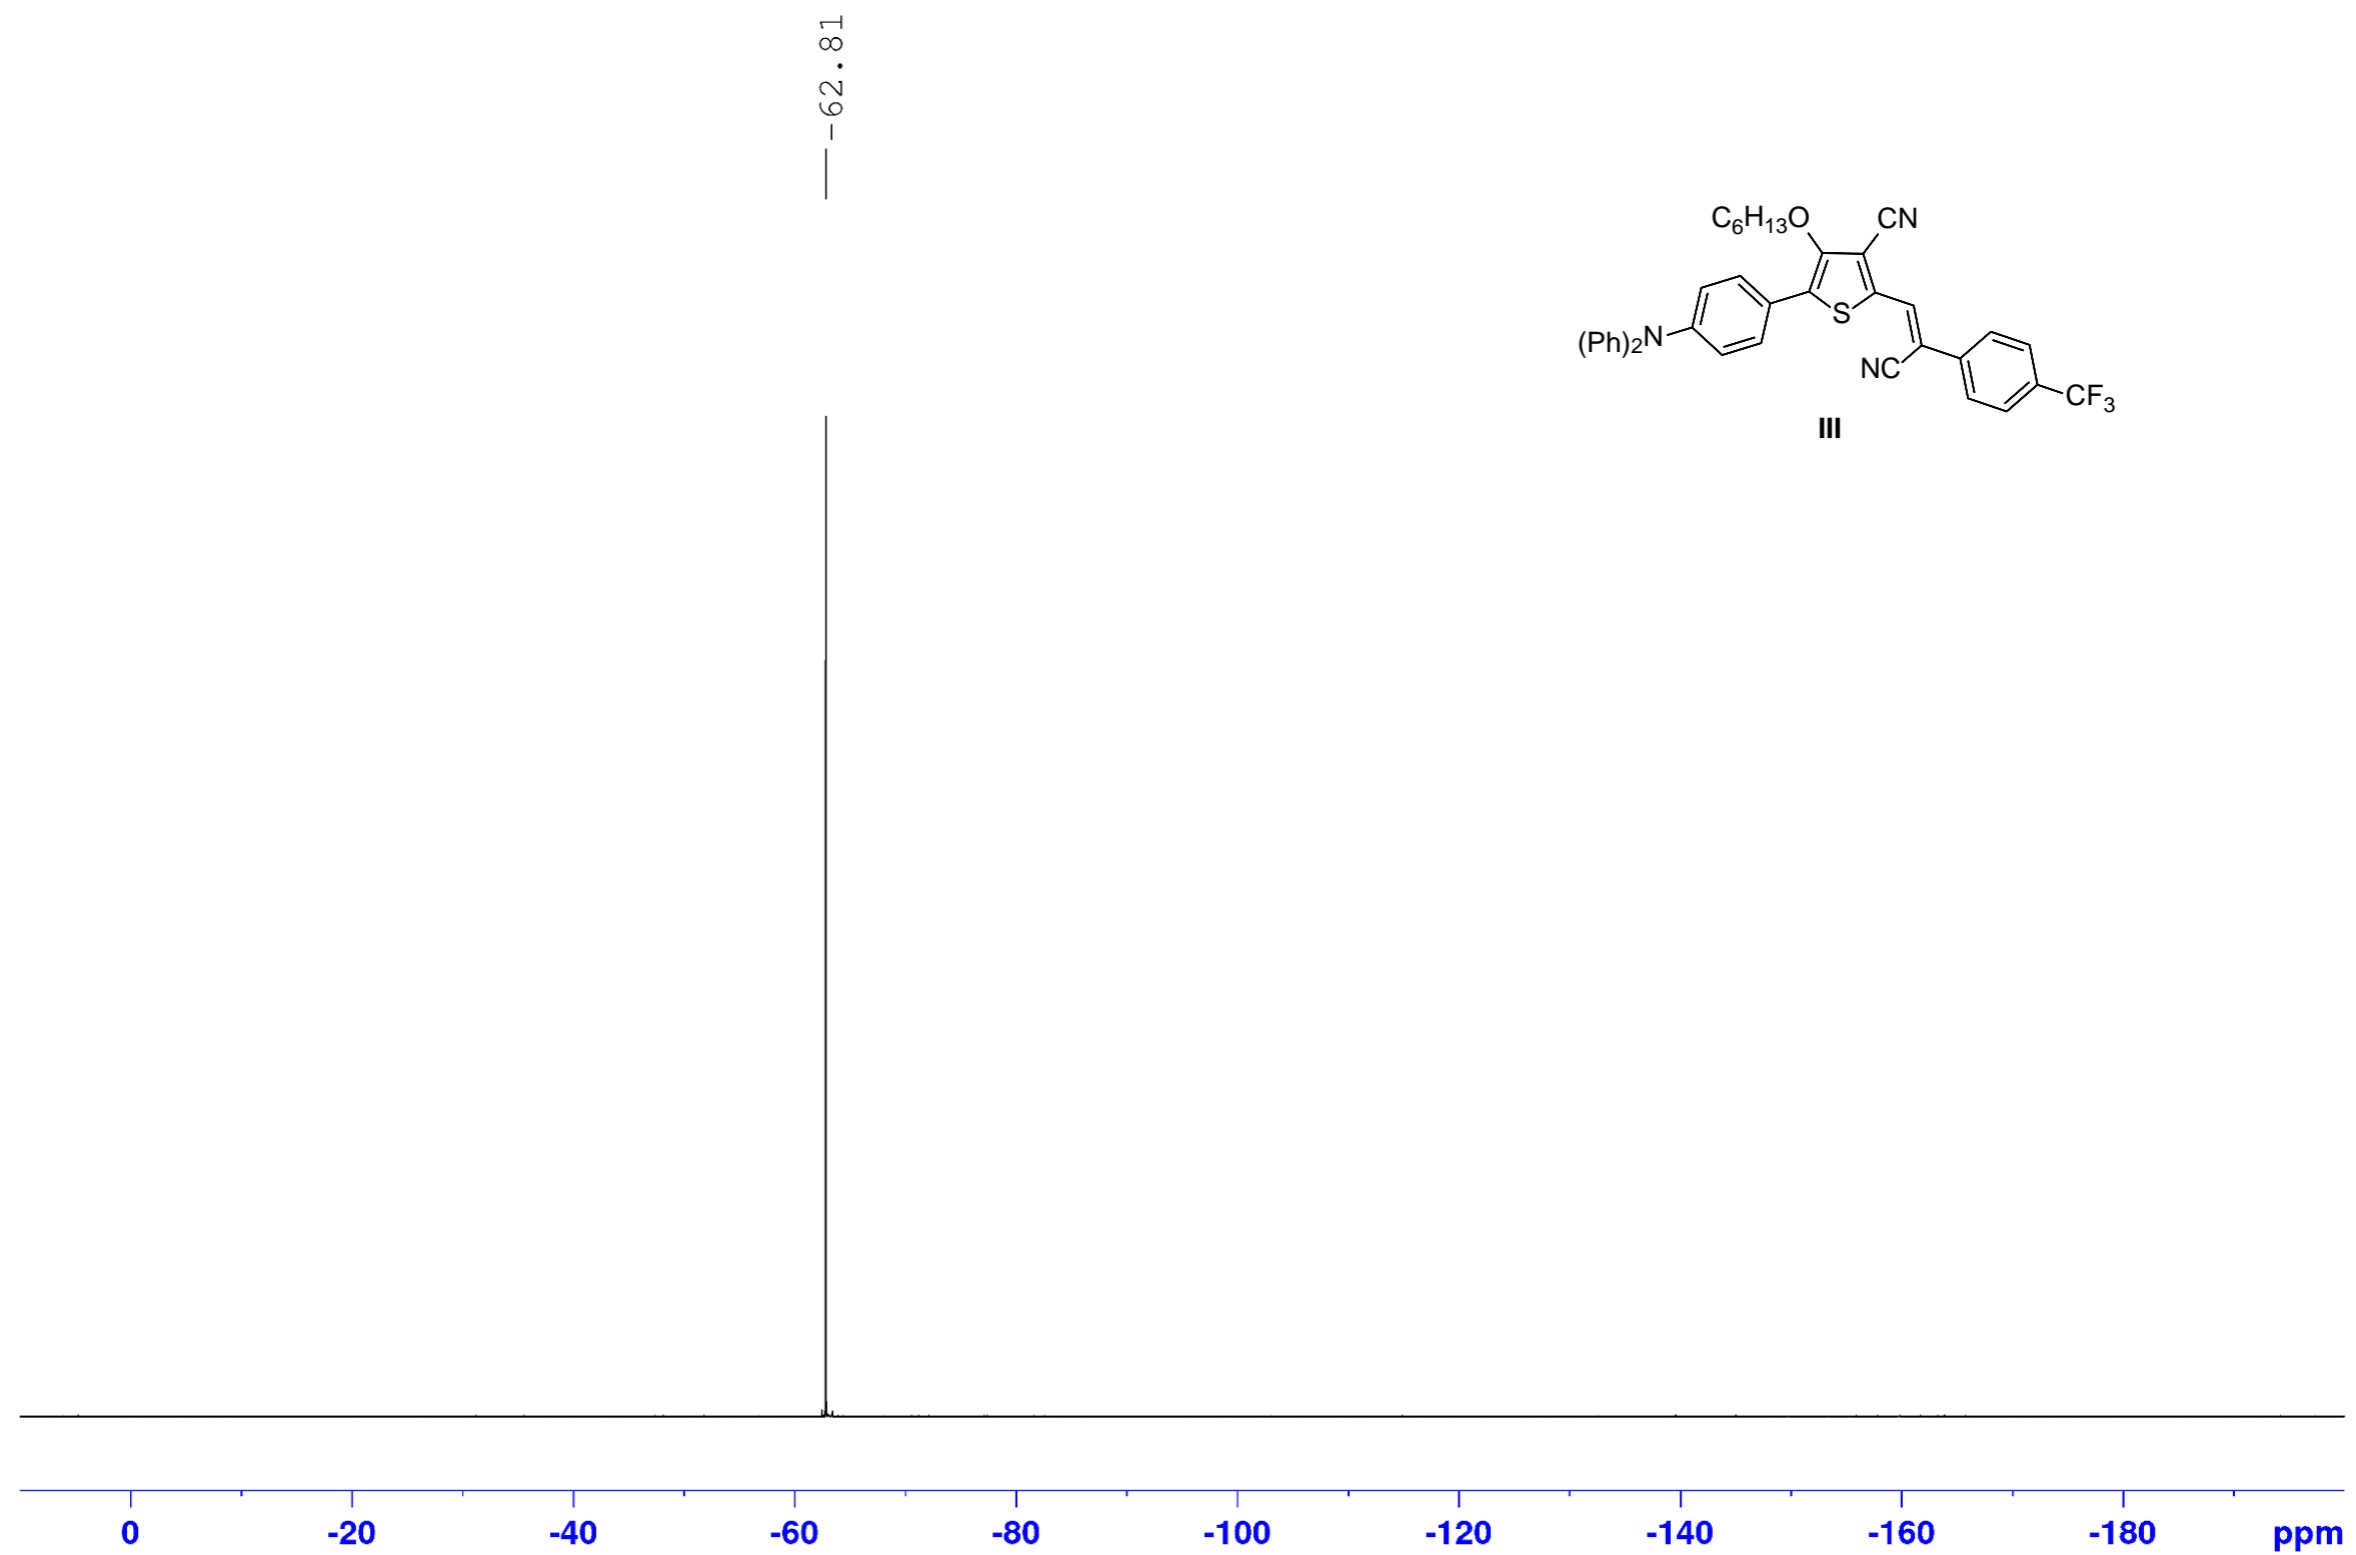

**Figure S16 :**  $^{19}\text{F}$  NMR spectra in  $\text{CDCl}_3$  of **III**
